1 **Title**

2 Cysteine is a limiting factor for glioma proliferation and survival

3 **Authors**

4 Victor Ruiz-Rodado<sup>1</sup>, Tyrone Dowdy<sup>1</sup>, Adrian Lita<sup>1</sup>, Tamalee Kramp<sup>2</sup>, Meili Zhang<sup>1</sup>, Jinkyu  
5 Jung<sup>1</sup>, Ana Dios-Esponera<sup>3</sup>, Christel C. Herold-Mende<sup>4</sup>, Kevin Camphausen<sup>2</sup>, Mark  
6 R. Gilbert<sup>1</sup>, and Mioara Larion<sup>1\*</sup>

7  
8 **Affiliations**

9 <sup>1</sup>Neuro-Oncology Branch, Center for Cancer Research, National Cancer Institute, National  
10 Institutes of Health, Bethesda, US.

11 <sup>2</sup>Radiation Oncology Branch, Center for Cancer Research, National Institutes of Health, Bethesda,  
12 US.

13 <sup>3</sup>Fred Hutchinson Cancer Research Center, Seattle, US.

14 <sup>4</sup>Division of Neurosurgical Research, Department of Neurosurgery, University Hospital  
15 Heidelberg, Heidelberg, Germany.

16  
17 **\*Corresponding author:** Mioara Larion

18 Tenure-Track Investigator, Metabolomics

19 Neuro-Oncology Branch

20 37 Convent Drive, Room 1136A

21 Bethesda, MD 20814

22 Phone number: 240-760-6825

23 Email: [mioara.larion@nih.gov](mailto:mioara.larion@nih.gov)

## 24 **Abstract**

25 Nutritional intervention is becoming more prevalent as adjuvant therapy for many cancers in view  
26 of the tumor dependence on external sources for some nutrients. We report the dependence of  
27 glioma cells on exogenous cysteine/cystine, despite this amino acid being nonessential. <sup>13</sup>C-tracing  
28 and the analysis of cystathionine synthase and cystathioninase levels revealed the metabolic  
29 landscape attributable to cysteine deprivation, and the disconnection between the methionine cycle  
30 and the transsulfuration pathway. Therefore, we explored the nutritional deprivation in a mouse  
31 model of glioma. Animals subjected to a cysteine/cystine-free diet survived longer, with  
32 concomitant reductions in glutathione and cysteine plasma levels. At the end point, however,  
33 tumors displayed the ability to synthesize glutathione, although higher levels of oxidative stress  
34 were detected. We observed a compensation from the nutritional intervention revealed as the  
35 recovery of cysteine-related metabolites in plasma. Our study highlights a time window where  
36 cysteine deprivation can be exploited for additional therapeutic strategies.

37

## 38 **Introduction**

39 The metabolism of tumor cells depends on many factors, notably, nutrient availability from the  
40 microenvironment and oncogenic mutations. Others have studied whether restricting the nutrient  
41 availability from the microenvironment can reduce the distinctive high proliferation rate of Myc-  
42 driven tumors, which require glutamine (1-3), or melanoma cells, which require leucine (4) or  
43 serine (5). Although such dietary interventions have been explored recently, with the goal to  
44 “starve” cancer cells (6, 7), their nutrient requirements and the mechanisms underlying their  
45 dependence on specific metabolites obtained from the environment are not fully understood.

46 Gliomas are brain tumors that can have an aggressive phenotype and currently have no curative  
47 treatment. The potential of incorporating a dietary plan into the treatment of this disease is highly  
48 desirable by patients. In clinical studies of gliomas, one of the most popular diets as adjuvant  
49 therapy is the ketogenic diet (8), with over 12 clinical trials currently exploring that type of  
50 intervention (NCT03451799, NCT03328858, NCT03160599, NCT02694094). However, no other  
51 interventional diets are being explored for this disease, in part due to a lack of preclinical evidence.  
52 Gliomas harboring IDH1 mutations have been reported to have a decreased ability to compensate  
53 for reactive oxygen species (ROS) (9), due to reduced IDH1-wildtype activity and concomitant  
54 low nicotinamide adenine dinucleotide phosphate (NADPH) (10). Recent reports noted that  
55 upregulation of antioxidant pathways compensates for the increased ROS levels found in IDH1-  
56 mutant tumors (11). By tilting the balance towards increased oxidative stress (12), potentially via  
57 interventional diets, these findings provide a new framework to investigate alternative therapeutic  
58 strategies for gliomas.

59 Diets that restrict specific amino acids, particularly essential amino acids, have been explored in  
60 other cancers (6). However, cysteine is a nonessential amino acid, as it can be synthesized from  
61 methionine through the transsulfuration (TS) pathway. The most abundant form of cysteine is  
62 cystine, which has plasma levels 10 times higher than cysteine (13). Once cystine enters the cell it  
63 is reduced to cysteine, which then can be condensed with glutamate to form glutamylcysteine (Glu-  
64 Cys), a reaction that is the rate-limiting step for glutathione (GSH) synthesis, which is a major  
65 ROS scavenger. Alternatively, methionine can be converted into homocysteine through its  
66 sequential transformation into the metabolic intermediates S-adenosylmethionine (SAM) and S-  
67 adenosylhomocysteine (SAH). Subsequently, homocysteine can either be diverted into cysteine  
68 synthesis through the TS pathway or be remethylated to yield methionine and generate

69 tetrahydrofolate. Hepatic tissue synthesizes almost half of the total pool of GSH from methionine-  
70 derived cysteine (14), although the importance of the TS pathway is not limited to the liver. Indeed,  
71 experiments conducted in mice revealed 29% less GSH in brain presenting homozygous  
72 cystathionine  $\beta$ -synthase gene disruption (15). However, it is not clear when this pathway plays a  
73 main role in supplying cysteine instead of being taken up from the environment (16).  
74 Herein, we describe the metabolic landscape resulting from cysteine/cystine-deprivation,  
75 including metabolic alterations beyond cysteine metabolism. We then propose a new method to  
76 hypersensitize glioma cells to oxidative stress without using any drug treatment. We translated our  
77 approach to an *in vivo* model of IDH1-mutant glioma and found a transitory disruption of cysteine  
78 metabolism at the systemic level, which is compensated over time. Nevertheless, it provides a  
79 survival benefit in our animal model. This study highlights how we can use dietary interventions  
80 to create metabolic vulnerabilities that can be exploited to design more efficient therapy.

81

## 82 **Results**

83 *Cysteine and cystine deprivation halt the growth and reduce the viability of gliomas by*  
84 *downregulating protein translation and glutathione synthesis*

85 Three glioma cell lines (BT142, TS603, and NCH1681) were cultured in DMEM:F12, which either  
86 contained or lacked both cysteine and cystine. The absence of those amino acids had an  
87 antiproliferative effect (Figure 1A), which was more intense in the BT142 cell line, limiting its  
88 growth to 50% over the course of 96 hours. Moreover, cells were unable to form neurospheres  
89 (Figures 1B and S1A), and their viability was reduced by approximately 30% in 96 hours (Figure  
90 1C). At 72 hours, all cell lines displayed a significant decrease ( $p < 0.001$  for all cell lines) in  
91 viability, and TS603 even had a significant decrease in viability at 48 hours ( $p = 0.038$ ). To

92 examine the key factors involved in both the antiproliferative effect and the reduction in viability  
93 resulting from cysteine/cystine-deprivation, we conducted rescue experiments by treating the cells  
94 with downstream metabolites of cysteine or methionine, such as SAM, cystathionine,  
95 homocysteine, taurine, or GSH (Figure 1D). We also employed an inhibitor of the IDH1-mutant  
96 enzyme (AGI5198) because these cell lines harbor this mutation. This agent did not alter the  
97 deleterious effect of cysteine/cystine-deprivation (Figure 1E); indeed, IDH1-wildtype glioma cell  
98 lines were also affected by this treatment (Figure S1B). The experiments revealed that only  
99 homocysteine and cystathionine could restore cell growth; thus, we explored the link between their  
100 supplementation and an increase in cysteine availability by checking the levels of GSH and the  
101 expression of glutamate-cysteine ligase modifier subunit (GCLM) (Figure S1C), which acts as a  
102 sensor of cysteine levels (17) in GSH synthesis. Both GSH (Figure 1F) and the expression of  
103 GCLM were reduced under cysteine/cystine-deprivation, and their levels recovered after adding  
104 homocysteine and cystathionine, revealing that both metabolites are cysteine donors. Amino acid  
105 deprivation has been shown to inhibit protein synthesis in cancer (18), and because cysteine is also  
106 a proteinogenic amino acid, we evaluated the capacity of the cells subjected to cysteine/cystine-  
107 deprived conditions to synthesize protein. We examined the levels of phosphorylated eIF2 $\alpha$  (p-  
108 eIF2 $\alpha$ ) and GCN2 (p-GCN2), two proteins involved in the stress response to amino acid starvation,  
109 and uncharged t-RNAs (19, 20) in addition to treating glioma cells with puromycin and then  
110 analyze the incorporation to nascent proteins, as previously described (21). p-eIF2 $\alpha$  and p-GCN2  
111 levels were both higher in the samples grown in the absence of cysteine/cystine (Figure 1G).  
112 Furthermore, after 72 hours, levels of puromycin-positive labeled proteins were higher for glioma  
113 cell lines grown in full medium than for cells deprived of cysteine/cystine (Figures 1H and S1E),  
114 indicating that deprivation reduces the protein synthesis activity. Moreover, both homocysteine

115 and cystathionine recovered cell viability together with GSH and Trolox, an antioxidant analogue  
116 of vitamin E, suggesting that the loss in viability was linked to the decreased ability of these cells  
117 to buffer the naturally occurring ROS (Figures 1I and S1D) rather than to the availability of  
118 cysteine/cystine. However, the ability of GSH to provide full protection against ROS was  
119 constrained by its poor cellular permeability (22), since the intracellular levels of GSH along with  
120 cell viability could be further increased (Figures S1F and S1G) by treatment with an esterified  
121 analogue of GSH that is more permeable (23).

122 Tumors have a higher proliferative rate, which translates into higher levels of oxidative stress (24),  
123 which can engage cancer cells in ROS-dependent death. We explored the mechanism of cell death  
124 by treating the cells with ferrostatin-1 (at cell seeding time), an inhibitor of ferroptosis (25), and  
125 then analyzing apoptotic markers (Figure S1I and S1J). Cell viability did not recover after  
126 treatment with ferrostatin 1 (Figure S1H), and an increase in apoptotic and preapoptotic cells was  
127 detected (Figure S1J) after 96 hours. Accordingly, the mechanism of cell death observed in these  
128 cell lines under cysteine/cystine depletion can be assigned to apoptosis, a process that can be  
129 triggered by high levels of ROS (26, 27). Thus, the antiproliferative effects observed in our study  
130 occurred in part from cells' inability to synthesize cysteine for downstream protein synthesis,  
131 whereas the loss of viability was attributed to their inability to fight ROS.

132

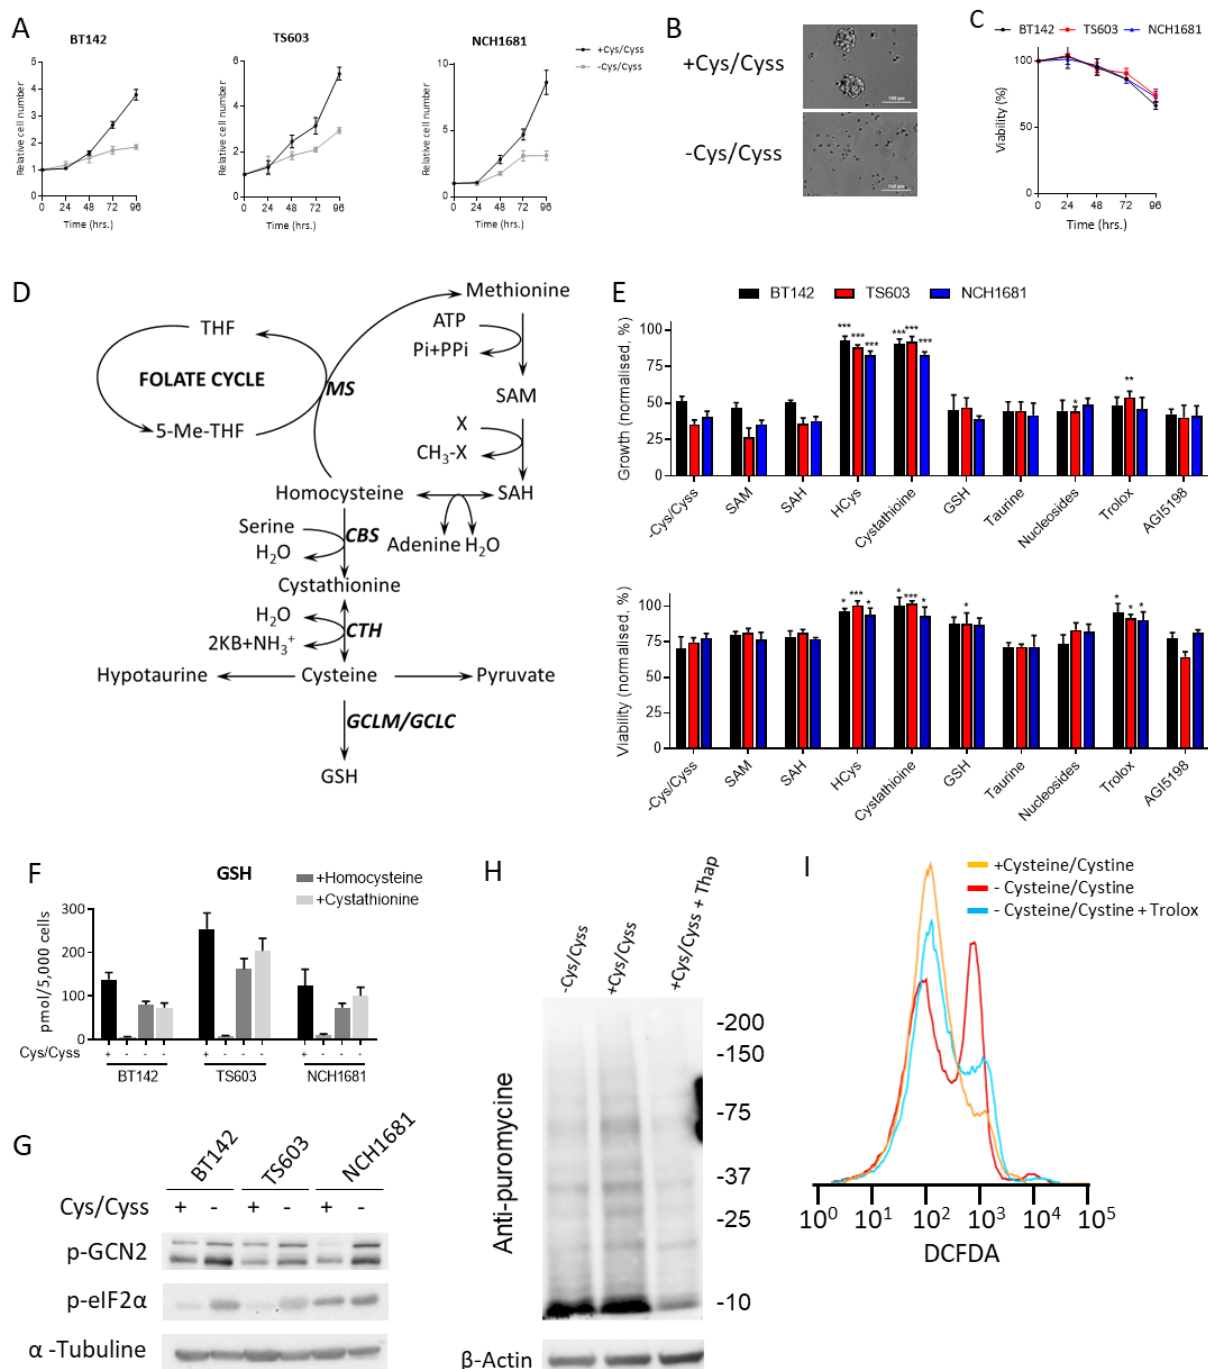

133  
 134 **Figure 1. Cysteine and cystine deprivation halt growth and reduce viability in glioma**  
 135 **through reduced protein translation and glutathione synthesis:** (A) Growth rate of IDH1-  
 136 mutant glioma cell lines under cysteine/cystine deprivation (Cys/Cyss) conditions over 96 hours.  
 137 Data are shown as the ratio of viable cells to cells seeded (n = 4, data displayed as mean ± SD for

138 each time point and condition). (B) Neurosphere formation after 96 hours of incubation in the same  
139 medium. BT142 cells displayed as a representative picture. (C) Viability after 96 hours in medium  
140 lacking cysteine and cystine as the percentage over the viability of cells in control conditions (n =  
141 3, data displayed as mean  $\pm$  SD for each time point and condition). (D) Metabolic pathways related  
142 to cysteine (THF, tetrahydrofolate; MS, methionine synthase; CBS, cystathionine beta-synthase;  
143 CTH, cystathionine gamma-lyase; GCLM, glutamate-cysteine ligase modulatory subunits; and  
144 GCLC, glutamate-cysteine ligase catalytic subunits). (E) Rescue experiments involving the  
145 addition of different metabolites and agents to cells grown without cysteine/cystine (data displayed  
146 as control-normalized growth [top panel] and viability [bottom panel] as the mean  $\pm$  SD for n =  
147 3; \* $p$  < 0.05, \*\* $p$  < 0.005, \*\*\* $p$  < 0.001, each condition was compared with the -Cys/Cyss values  
148 by using a two-tailed Student's  $t$ -test). (F) Glutathione (GSH) levels in complete medium (+) and  
149 medium lacking cysteine/cystine (-) plus homocysteine and cystathionine (data displayed as the  
150 mean  $\pm$  SD for n = 3). (G) Western blot of p-GCN2 and p-eIF2 $\alpha$  in both complete and  
151 cysteine/cystine-free media for the 3 cell lines investigated. (H) Western blot shows puromycin-  
152 labeled proteins after 72 hours. Thapsigargin-treated samples are included as negative controls.  
153 BT142 cell line data is shown as a representative blot. (I) DCFDA assay as a marker of ROS  
154 production in glioma cell lines under cysteine/cystine deprivation and treated with 0.25 mM Trolox  
155 for 96 hours. BT142 cell line data is shown as a representative diagram.

156

### 157 ***Global metabolic consequences of cysteine and cystine deprivation***

158 Next, we explored the metabolic changes resulting from this nutrient deprivation condition after  
159 48 hours (Figure 2A), before cellular viability is affected (Figure 1C); thus, we could analyze the  
160 metabolism without the potential confounding factors attributable to the mechanisms of cell death.



161 The main metabolites affected were those directly related to the pathways that intrinsically involve  
162 cysteine/cystine, as well as those involved in related metabolic routes, such as the tricarboxylic  
163 acid (TCA) cycle (Figure 2A). In our metabolomic analysis, citrulline levels were also significantly  
164 lower after 48 hours of cysteine/cystine deprivation, but we could not detect any additional  
165 metabolites from the urea cycle of the arginine biosynthesis pathway. However, arginine levels in  
166 NCH1681 were significant higher under cysteine/cystine deprivation. To consider all these  
167 metabolic changes together, we performed a pathway analysis to identify the routes that were most  
168 affected (Figure 2B). We also evaluated the potential upregulation of enzymes connecting the  
169 methionine cycle with cysteine synthesis in order to compensate for the lack of cysteine/cystine.  
170 Expression of the first enzyme involved in the TS pathway, cystathionine beta-synthase (CBS)  
171 was not upregulated (Figure 2C), which reveals a metabolic disconnection between the methionine  
172 cycle and the TS pathway, even though the subsequent enzyme, cystathionine gamma-lyase  
173 (CTH), was upregulated.

174 We then explored whether methionine availability limited the cells' ability to upregulate the TS  
175 pathway. We identified the  $^{13}\text{C}$ -*methyl* resonance signal from methionine in the media even after  
176 72 hours, which indicated that methionine availability is not responsible for restricting cell growth  
177 even in the absence of cysteine/cystine (Figure 2D). Concurrently, we detected the accumulation  
178 of *methyl*- $^{13}\text{C}$ -labeled methionine in cysteine/cystine-deprived cells (Figure 2E). Methionine is a  
179 proteinogenic amino acid, and the downregulation of protein synthesis (Figures 1G, 1H, and S1E)  
180 likely increases the intracellular pool of methionine. Indeed,  $^{35}\text{S}$ -methionine/cysteine labelling  
181 followed by autoradiography (or other detection methods) can be used to assess the biosynthesis  
182 of proteins. The methyl group of methionine can also be transferred to nucleotides to contribute to  
183 the epigenetic landscape; lipids and proteins (28, 29) and the resulting metabolite, SAH, can be

184 further transformed into homocysteine or be remethylated to generate methionine. Accordingly,  
185 we used metabolomics analysis to determine whether the total levels of metabolites involved in  
186 these related pathways would be affected by cysteine/cystine deprivation. Global profiling  
187 experiments using liquid chromatography–mass spectrometry (LC-MS) did not reveal any effect  
188 on the synthesis of methyl donors and folate metabolism (Figure S2B and S2C). Methyl donors  
189 were assessed by the ratio of SAM to SAH (Figure S2D) as an indicator of cellular methylation  
190 capacity (30). Additionally, we investigated the contribution of cysteine and cystine to derived  
191 metabolites through  $^{13}\text{C}$ -C3-cysteine and  $^{13}\text{C}$ -C3,3'-cystine labeling, respectively, and LC-MS  
192 experiments. After 48 hours, nearly 100% of GSH was derived from exogenous cysteine/cystine  
193 (Figure 2F). We also observed an active reverse reaction of CTH, which was inferred from the  
194 labelling of cystathionine from  $^{13}\text{C}$ -labeled cysteine and cystine, and the dependence of  
195 hypotaurine synthesis on exogenous cysteine/cystine. To determine the metabolic effects of  
196 inhibiting the TS pathway, we treated cells with 1 mM propargylglycine (PAG) (Figure 2G) for  
197 48 hours. This treatment did not extensively affect the metabolic profiles of our cell lines (Figures  
198 S2E and S2F), although GSH levels were slightly lower but far from the 10-fold decrease (Figure  
199 2H) obtained after cysteine/cystine deprivation. These analyses revealed that the TS pathway is  
200 not intensively active in these cells, which rely almost completely on exogenous cysteine/cystine  
201 for GSH synthesis. We incubated our cells in C3- $^{13}\text{C}$ -serine, which revealed a labeling of <1% in  
202 GSH in the presence of cysteine and cystine (Figure S2G) and a slight upregulation in media  
203 lacking both amino acids. Additionally, we observed an accumulation of m+5 glutamine (Figure  
204 2I) along with an increased flux of glutamine toward the TCA cycle, as it is no longer needed for  
205 GSH synthesis (through glutamate conversion) or cystine import (31). Accordingly, glutamate-  
206 derived metabolites involved in the TCA cycle appear to be upregulated (Figure 2J). In contrast,

207 nucleotide synthesis from glutamine was downregulated (Figure S2H), possibly due to halted cell  
 208 proliferation, which decreased the demand for nucleotide biosynthesis.  
 209

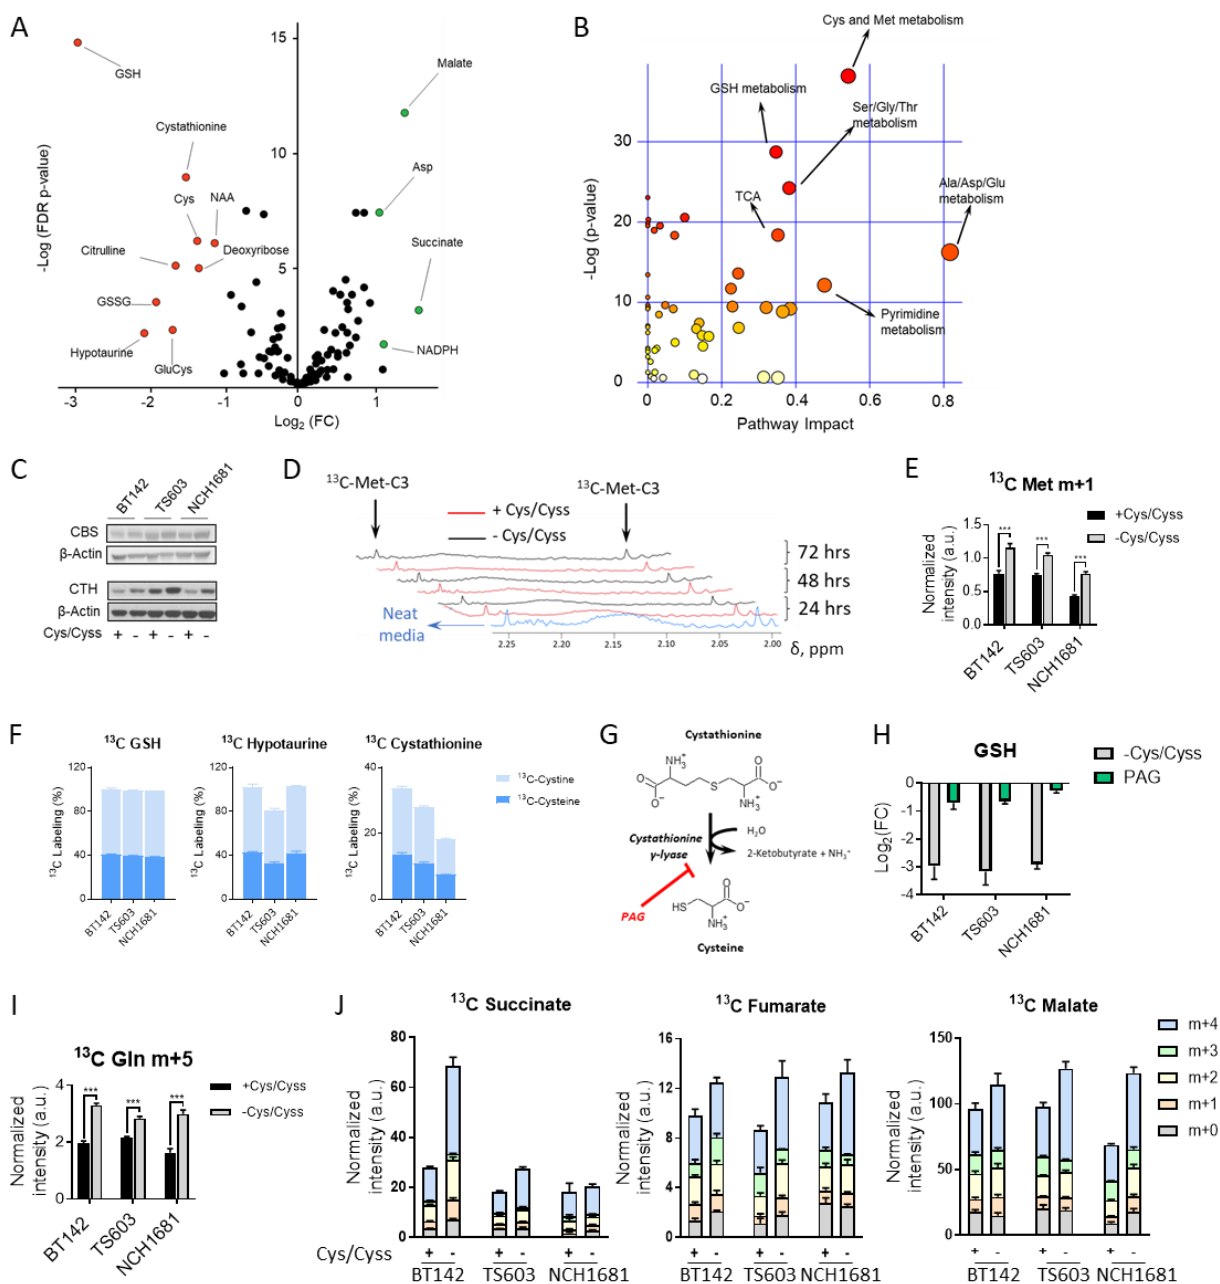

210  
 211 **Figure 2. Global metabolic consequences of cysteine and cystine deprivation:** (A) Volcano  
 212 plot displaying the  $\log_2(\text{FC})$  vs  $\log(\text{FDR } p\text{ value})$  for all the metabolites identified by LC-MS.

213 Metabolites highlighted in green (upregulated upon cysteine/cystine deprivation) or red  
214 (downregulated) have  $\text{Log}_2(\text{FC}) > 1$  or  $< -1$  and an FDR  $p$  value  $< 0.05$  (5 replicates per cell line  
215 and per condition). (B) Pathway analysis performed on the metabolites levels computed depicts  
216 the major pathways affected. (C) Western blot of cystathionine beta-synthase (CBS) and  
217 cystathionine gamma-lyase (CTH). (D) NMR spectra of media over time, including assignments  
218 for *methyl*- $^{13}\text{C}$ -methionine. Representative spectra shown as normalized intensities to the TSP  
219 signal ( $\delta = 0.00$  ppm) and cell number. (E) *Methyl*- $^{13}\text{C}$ -methionine levels in cells seeded in medium  
220 containing this tracer (data displayed as bar plots; mean  $\pm$  SD,  $n = 3$ ; \*\*\* $p < 0.001$ , two-tailed  
221 Student's  $t$ -test). (F)  $^{13}\text{C}$ -tracing experiments displaying  $^{13}\text{C}$ -C3-cysteine and  $^{13}\text{C}$ -C3,3'-cystine  
222 incorporation into cystathionine, GSH, and hypotaurine ( $n=3$  samples per cell line and  $^{13}\text{C}$  probe).  
223 These experiments were conducted separately for each tracer ( $^{13}\text{C}$ -C3-cysteine and  $^{13}\text{C}$ -C3,3'-  
224 cystine). (G) Metabolic effect of propargylglycine (PAG) due to inhibition of the TS pathway,  
225 and (H) decrease of GSH levels ( $n = 5$  samples per cell line) for both PAG treatment and  
226 cysteine/cystine deprivation displayed as  $\text{Log}_2(\text{FC})$ . (I)  $^{13}\text{C}$  incorporation from  $^{13}\text{C}$ -U-glutamine  
227 into glutamine pools, and (J) TCA metabolites displayed as the contribution of each isotopologue  
228 to the total metabolite pool.  $^{13}\text{C}$  tracing experiments are displayed as bar plots; mean  $\pm$  SD,  $n =$   
229 3 (\*\*\* $p < 0.001$ , two-tailed Student's  $t$ -test).

230

### 231 ***Redox homeostasis in glioma cell lines requires exogenous cystine and cysteine***

232 IDH1-mutant enzyme utilizes NADPH to reduce  $\alpha$ -ketoglutarate to D-2-hydroxyglutarate, which  
233 is also needed to regenerate GSH from GSH-disulfide (GSSG) catalyzed by glutathione reductase  
234 (Figure 3A). The ratio of NADP to NADPH, a marker of the antioxidation capacity of the cell  
235 (32), becomes imbalanced when cysteine availability is limited (Figure 3B). Additionally, we

236 observed a significant reduction in the GSH:GSSG ratio (Figure 3C), although the availability of  
237 NADPH was higher in cysteine/cystine-starved cells. This decrease in the GSH:GSSG ratio  
238 indicated reduced glutathione reductase activity when glioma cells were grown in a  
239 cysteine/cystine-lacking medium, as the expression levels of the enzyme were maintained (Figure  
240 S3A).

241 We also tested another main antioxidant system that was recently linked to tumor progression (33),  
242 thioredoxin, as a potential compensatory mechanism for GSH depletion; however, its expression  
243 levels remained unchanged when cells were deprived of cysteine (Figure S3B). These findings  
244 suggest that GSH depletion does not trigger the compensatory antioxidative mechanisms involving  
245 overexpression of thioredoxin in the time frame tested.

246 To exploit these findings therapeutically, we tested whether our nutrient restriction sensitizes these  
247 cancer cell lines to ROS and induces oxidative stress, as this approach has been shown to  
248 effectively induce the death of other types of cancer cells (34, 35). Thus, we conducted short  
249 titration experiments with tert-butyl hydroperoxide (tBH) and H<sub>2</sub>O<sub>2</sub> (Figure 3D) by seeding the  
250 cells for 24 hours in the different media and then treating them for 6 hours with those ROS-  
251 inducing agents. This approach decreased cellular viability more intensively in cells grown for 24  
252 hrs without cysteine/cystine. Indeed, 50 μM of tBH selectively induced cell death in 30%–50% of  
253 cells but did not affect the viability of the cells grown in full medium. Likewise, 100 μM of H<sub>2</sub>O<sub>2</sub>  
254 had the same deleterious effect. That ROS-induced cell death could be partially reversed by adding  
255 Trolox or GSH (Figure S3C). Traditionally, buthionine sulfoximine (BSO) has been the drug of  
256 choice to target GSH synthesis and increase the sensitivity of cancer cells to oxidative stress;  
257 however, that approach has not been effective in some cases (31), including gliomas as a single  
258 agent (36). We observed similar results for the BT142 cell line, in which BSO as a single agent

259 did not reduce cellular viability (Figure 3E), and the effect was much lower than that achieved by  
260 our approach. Similarly, nutrient limitation had a more intense effect on TS603 and NCH1681  
261 cells because, unlike BSO, nutrient deprivation also affects the cells' ability to regenerate GSH  
262 through glutathione reductase activity (37). We also tested whether cysteine/cystine deprivation  
263 synergizes with therapeutic agents, such as temozolomide (TMZ), that are typically part of the  
264 standard care for glioma therapy. The combination of nutrient restriction and TMZ (Figure S3E)  
265 improved the effect of TMZ for doses of 0.01 and 0.1 mM, but that decrease in viability was not  
266 more intense than the one generated by cysteine/cystine deprivation alone. At 1 mM TMZ, the  
267 cells experienced a more intense effect, but it was not enhanced by cysteine/cystine deprivation.  
268

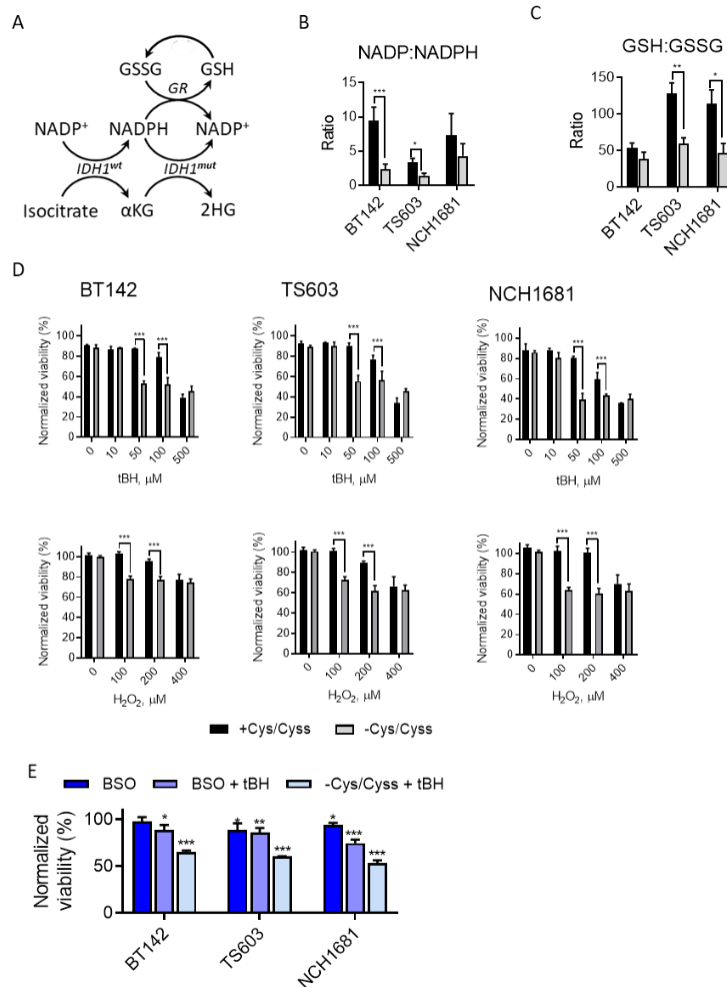

269

270 **Figure 3. Redox homeostasis in glioma cell lines requires exogenous cystine and cysteine: (A)**

271 Simplified representation of the links between NADPH, IDH1 mutation, and GSH metabolism

272 (GR, glutathione reductase). (B) Ratio of NADP and NADPH, and (C) GSH and GSSG grown in

273 full medium (black) or cysteine/cystine-free medium (grey). Data are mean ± SD, n = 5 (\**p* < 0.05,

274 \*\**p* < 0.005, \*\*\**p* < 0.001, two-tailed Student's *t*-test). (D) Titration experiments involving tBH

275 or H<sub>2</sub>O<sub>2</sub> (data are mean ± SD, n = 3; \*\*\**p* < 0.001, 2-way ANOVA followed by Sidak's multiple

276 comparison test). (E) Effect of BSO plus tBH on viability. Data are mean ± SD of viability values

277 normalized to the control conditions (full medium), n = 3; \**p* < 0.05, \*\**p* < 0.005, \*\*\**p* < 0.001,

278 2-way ANOVA followed by Dunnet's multiple comparison test for control vs. all).

279

280 ***Cysteine/cystine-free diet reduces the levels of glutathione temporally in a mouse model of***  
281 ***glioma and increases survival***

282 To test the effect of cysteine/cystine-deprivation on survival, we conducted an *in vivo* experiment  
283 in which we injected mice intracranially with NCH1681 cells. Twelve days later, we randomized  
284 the mice into 2 groups and provided a cysteine/cystine-free or a control diet the following day. We  
285 then monitored the plasma levels of the main metabolites related to cysteine, as potential  
286 biomarkers of treatment response at 16, 35, 44, and 55 days after intracranial injection. For each  
287 time point, metabolite levels were normalized to those computed in the control group. GSH and  
288 cystine levels in plasma were significantly lower in the cysteine/cystine-free diet group 23 days  
289 after initiating the nutritional intervention (Figure 4A). We also performed a <sup>13</sup>C-tracing  
290 experiment *in vivo* at the study end point by injecting <sup>13</sup>C-U-glutamine into the tail vein and  
291 tracking the incorporation of this metabolite into glutamate, glutamine, and GSH in order to  
292 evaluate the ability of tumor cells to synthesize GSH *de novo*. We observed active *de novo*  
293 synthesis of GSH in the cysteine/cystine-free diet group, similar to that detected in the control  
294 group (Figure 4B). Moreover, levels of <sup>13</sup>C-labeled m+5 glutamine were higher in the tumor region  
295 for both cohorts, as previously reported (38), and lower glutamate m+5 levels correlated more  
296 strongly with the cysteine/cystine-free diet. GSH m+5 levels were higher than those detected in  
297 the respective contralateral regions, in accordance with a higher need for antioxidant capacity in  
298 tumor cells (33, 39). Levels of <sup>13</sup>C-labeled GSH in tumor tissue under both diets were consistent  
299 with the recovery circulating levels of cystine in plasma (Figure 4A), indicating a systemic  
300 response to the nutritional intervention. Additional metabolites related to the cysteine pathway but  
301 diverted from the synthesis of GSH, such as taurine and hypotaurine, showed a different trend than



302 those of cystine and GSH; i.e., their levels diminished over time under the cysteine/cystine-free  
 303 diet (Figure S4). This temporary reduction in the main antioxidant source translated to increased  
 304 median survival of the mice by 26 days and enhanced oxidative stress in the tumor tissue of mice  
 305 given the cysteine/cystine-free diet (Figures 4C and D).  
 306

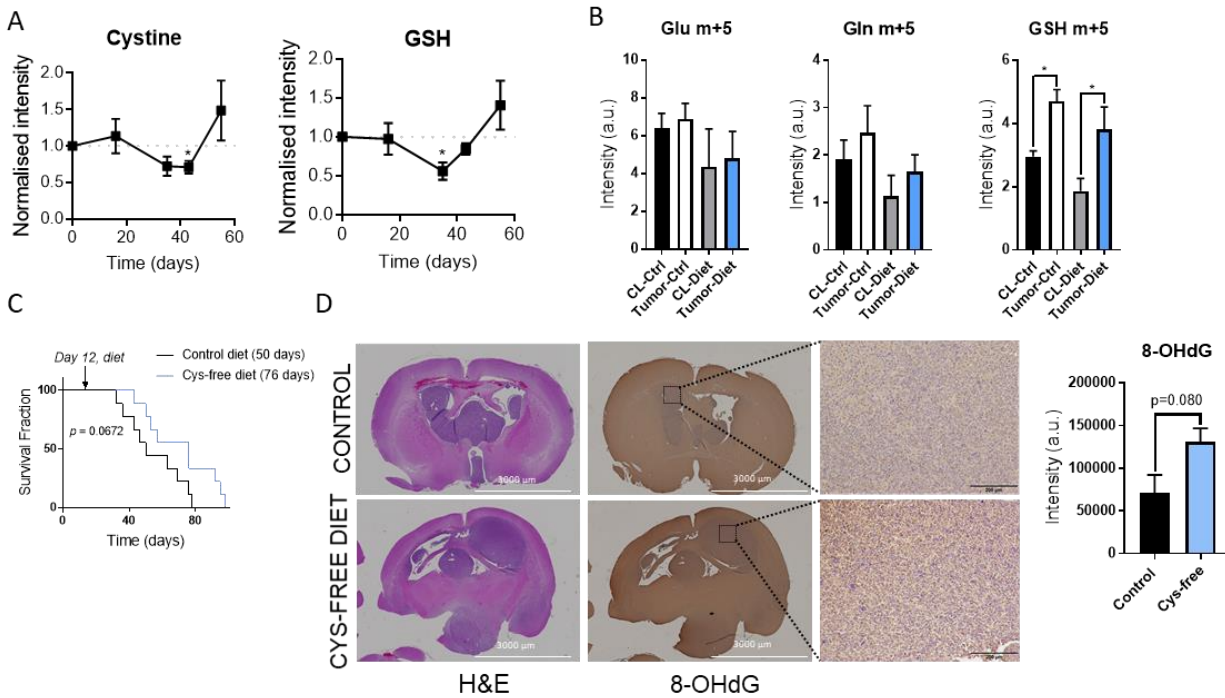

307  
 308 **Figure 4. Cysteine/cystine-free diet reduces the level of glutathione temporarily in a mouse**  
 309 **model of glioma and increases survival:** (A) Plasma levels of GSH and cystine normalized to  
 310 those computed for the control group (dotted line, reference values of the control group; metabolite  
 311 levels for the cysteine/cystine-free diet group are shown as mean  $\pm$  SEM;  $n = 5$ ;  $*p < 0.05$  by two-  
 312 tailed Student's  $t$ -test with Welch's correction). (B) Glutamate, glutamine, and GSH m+5 levels  
 313 in tumor tissue and contralateral (CL) regions of mice fed with the control (Ctrl) and  
 314 cysteine/cystine-free diets resulting from bolus injection of  $^{13}\text{C}$ -U-glutamine. Data are mean  $\pm$   
 315 SEM of the normalized intensities to tissue weight,  $n = 3-5$ .  $*p < 0.05$  by a one-way ANOVA

316 followed by Tukey's multiple comparisons test. (C) Survival analysis of intracranial glioma mouse  
317 model under both diets ( $n = 9$ ,  $p$  value obtained from a Mantel-Cox test, and median survival  
318 displayed between brackets). (D) Immunohistochemical analysis of hematoxylin and eosin  
319 (H&E)- and 8-hydroxydeoxyguanosine (8-OHdG)-stained tissues, including quantification of 8-  
320 OHdG (bars display mean  $\pm$  SD,  $n = 3$  mice).

321

## 322 **Discussion**

323 We have shown how dietary limitation of the nonessential amino acid cysteine has an  
324 antiproliferative effect and can reshape the metabolic landscape of cancer cells. Although the  
325 deprivation of cysteine was recently shown to have a deleterious effect on tumor growth (40), the  
326 metabolic consequences triggered by this situation were unexplored. Here, we provided a broad  
327 description of the perturbations occurring in the metabolic pathways of glioma cells, highlighting  
328 the absence of an active TS pathway and offering a supplementary window of intervention during  
329 which to reduce the tumor's ability to fight oxidative stress. It has been reported that limiting the  
330 exogenous contribution of cysteine is a potential treatment for prostate, pancreas, and breast  
331 cancers (41, 42); renal cell carcinomas (43); and leukemia (44).

332 The system known to divert homocysteine into cysteine involves the upregulation of CBS activity  
333 together with increased levels of SAM (45), which drives homocysteine into cystathionine, an  
334 irreversible reaction. Homocysteine levels must be maintained at low concentrations because an  
335 excess of this metabolite can increase ROS (46); accordingly, cells have developed clearing  
336 systems by remethylating it, yielding methionine, or by launching the TS pathway. Recently, a  
337 disconnection between both pathways was reported in cancer cell lines because the cells are unable  
338 to modulate the methylating enzyme (40), glycine N-methyltransferase, which was resolved by

339 ectopic overexpression of this enzyme. The methylation capacity of the glioma cell lines utilized  
340 in our study did not change a result of cysteine-limited conditions (Figure S2C). Rather, the  
341 constraint lies in the ability of the cells to divert the methionine cycle and generate downstream  
342 metabolites rather than upregulate enzymes involved in this route, because addition of the  
343 substrates for CBS and CTH recovered the cells' growth and viability (Figure 1E).

344 We detected incorporation of the  $^{13}\text{C}$  label from cysteine/cystine to cystathionine as well as  
345 overexpression of CTH after cysteine/cystine deprivation; thus, this result might suggest that  
346 cystathionine can act as a reservoir of cysteine. Then, in nutrient-limited conditions, cystathionine  
347 can be broken down to yield cysteine. The disconnection between the TS pathway and the  
348 methionine cycle was reported recently in similar experiments that found that after addition of  
349 either cystathionine or homocysteine, both proliferation and recovery were restored, but not when  
350 cells were supplemented with methionine in a cysteine-deficient medium (47).

351 It is not known why some cancers can upregulate the TS pathway and do not rely on the uptake  
352 of cystine and cysteine (16). Cysteine/cystine deprivation caused a 10-fold reduction in GSH levels  
353 in our cell lines, thereby hypersensitizing glioma cells to ROS and revealing a high dependence on  
354 the exogenous supply of this amino acid. A recent investigation also showed how tumors that have  
355 large antioxidant capacity require an exogenous supply of nonessential amino acids for  
356 proliferation (48). Targeting GSH synthesis has been a recurrent therapeutic strategy (41), mainly  
357 to sensitize tumor cells in combinatorial therapies (49-51). That approach has also been tested in  
358 IDH1-mutant cancers (36), although in the present work we observed how IDH1-wildtype gliomas  
359 were as sensitive as mutant gliomas to cysteine/cystine deprivation and that inhibiting IDH1-  
360 mutant activity did not affect the response of those cells to this approach.

361 Tumor cells display enhanced oxidative stress, which is compensated for by a larger antioxidant  
362 capacity (11, 39). Therefore, reducing the ability of tumor cells to fight against ROS can be an  
363 efficient strategy for treating cancer. From a pharmacologic point of view, brain tumors are  
364 challenging because of the selective permeability of the blood-brain barrier. Through our strategy,  
365 we could target the antioxidant capacity of tumor cells without using any drug therapy. Herein, we  
366 show that a cysteine-deprivation diet creates a window of therapeutic opportunity by decreasing  
367 GSH and its precursor (cystine/cysteine) at the systemic level (Figures 4A and S4), which could  
368 then be utilized in combination with a ROS-inducing agent. Although the plasma levels of these  
369 metabolites (GSH and cystine) were recovered afterwards, those of hypotaurine and taurine  
370 (Figure S4), which are generated through the cysteine dioxygenase pathway, were not recovered.  
371 Nevertheless, homocysteine and methionine levels did not change significantly due to the diet  
372 (Figure S4). The selective recovery of metabolites related to the antioxidant response might  
373 indicate an enhanced demand for ROS-buffering agents due to the increased oxidative stress  
374 generated by the diet. Nutritional interventions have been reported recently to be efficient  
375 strategies for tumor treatment in animal models (6), including a cysteine-limitation strategy in a  
376 model of pancreatic cancer (52). Our approach can be used clinically when it is necessary to limit  
377 the antioxidant capacity to enhance the effect of a secondary drug in a combinatorial treatment or  
378 when the resistance mechanism to a treatment depends on the ability of the cells to upregulate  
379 GSH metabolism.

380

381 **Limitations of the study:** Our investigation focused on IDH1-mutant gliomas because they have  
382 been traditionally described as being more vulnerable to oxidative stress, although this specificity  
383 was contrasted through treatment with AGI5198 and by including GSC923 and GSC827 cell lines

384 (IDH1-wildtype) in the study. Nevertheless, future investigations involving a mouse model of  
385 IDH1-wildtype glioma will provide additional evidence for our findings. The *in vivo* experiment  
386 correlated the results from time series analysis of plasma with those obtained from tissue at end  
387 point; therefore, a longitudinal analysis of tumor tissue after nutritional intervention would add  
388 more value to our interpretation. This approach would require GSH to be monitored in tissue  
389 through magnetic resonance spectroscopy or by euthanizing the animals at different time points to  
390 extract the metabolites for analysis.

391

## 392 **Materials and Methods**

### 393 **Cell culture**

394 Cell lines utilized in this investigation: TS603 (53) was a gift of T. A. Chan (Memorial Sloan-  
395 Kettering Cancer Center, USA); NCH1681 (54) was provided by C. Herold-Mende (University  
396 Hospital Heidelberg, Germany); BT142 was purchased from ATCC® (ACS-1018™); and GSC923  
397 and GSC827 were generated at the Neuro-Oncology Branch of the National Institutes of Health  
398 (Bethesda, USA). All cell lines were authenticated using DNA sequencing and the Illumina  
399 platform to detect the glioma methylome and the 1p/19q co-deletion.

400 All cell lines were grown in DMEM:F12 medium supplemented with antibiotics (penicillin-  
401 streptomycin), 1% N2 growth supplement, heparin sulfate (2 µg/mL), EGF (20 ng/mL), and FGF  
402 (20 ng/mL). For experiments involving seeding the cells in medium containing <sup>13</sup>C tracers or  
403 lacking cysteine/cystine, neurospheres grown in regular medium were collected, centrifuged, and  
404 resuspended in phosphate-buffered saline (PBS). Cells were then spun down, the supernatant was  
405 discarded, the pellet was resuspended again in PBS, and neurospheres were mechanically  
406 disaggregated for cell counting and subsequently seeded in the corresponding medium.

407 Medium lacking cysteine and cystine was provided by Thermo Fisher upon request. C3-<sup>13</sup>C-  
408 cysteine (Cambridge Isotopes Laboratories, CLM-1868) and C3,3'-<sup>13</sup>C-cystine (Cambridge  
409 Isotopes Laboratories, CLM-520) were utilized for <sup>13</sup>C tracing. Experiments involving *methyl*-<sup>13</sup>C-  
410 methionine (Cambridge Isotopes Laboratories, CLM-206-1), C3-<sup>13</sup>C-serine (Cambridge Isotopes  
411 Laboratories, CLM-1572), and U-<sup>13</sup>C-glutamine (Cambridge Isotopes Laboratories, CLM-1822)  
412 were performed in DMEM:F12 using in-house made medium that lacked the metabolites utilized  
413 as <sup>13</sup>C tracers. We created 20x–100,000x solutions (according to solubility) of all the components  
414 described in the DMEM:F12 formulation. For compounds that required a non-neutral pH to be  
415 soluble in water, a 1N solution of NaOH or HCl was used to titrate the solutions. Components of  
416 the medium were added to reach the final concentrations described in the commercial version of  
417 DMEM:F12, but linoleic acid was included directly from the vial provided by the vendor. Distilled  
418 water was added to obtain the final volume desired. This medium was subsequently filtered, and  
419 the supplements described above were added, and it was filtered again. All the <sup>13</sup>C probes were  
420 utilized in the same concentrations as those specified in the DMEM:F12 commercial formulation.

#### 421 **Treatments and proliferation assays**

422 A total of 50,000 to 100,000 cells/well were seeded in untreated 48-well plates with 0.75 mL of  
423 culture medium in triplicate (all experiments were repeated at least twice). After treatment,  
424 neurospheres were mechanically disaggregated and counted using the Vi-CELL XR cell counter  
425 (Beckman Coulter, USA). Glutathione was added at a final concentration of 0.5 mM. S-  
426 adenosylmethionine, homocysteine, cystathionine, and taurine were dissolved in PBS, filtered, and  
427 added to a final concentration of 0.1 mM. Nucleosides (100x; Millipore Sigma ES-008-D) were  
428 added directly to the cultured cells after filtration to a 1x final concentration. AGI5198 was  
429 dissolved in DMSO and used in a 10 μM final concentration. BSO and Trolox were dissolved in

430 PBS and DMSO, respectively, at 0.25 mM final concentrations. Ferrostatin 1 was utilized at a final  
431 concentration of 2  $\mu$ M. H<sub>2</sub>O<sub>2</sub> and tBH were dissolved in PBS, filtered, and added to the wells to  
432 reach the final concentrations specified in the graphs. Puromycin assay for detecting protein  
433 synthesis was performed as described in (18).

#### 434 **DCFDA assay**

435 Experiments were performed employing the DCFDA/H<sub>2</sub>DCFDA-Cellular ROS Assay Kit  
436 (Abcam, ab113851) according to the vendor's protocol and analyzed with a Sony SA3800 580  
437 spectral analyzer. Data were processed and plots were generated with FlowJo 10.6 (BD  
438 Biosciences).

#### 439 **Apoptosis assay**

440 Experiments were performed using the 7AAD Annexin V Apoptosis Detection Kit (Abcam,  
441 ab214663) according to the vendor's protocol and analyzed with a FACSCalibur (Becton  
442 Dickinson, Franklin Lakes, NJ, USA). Data were processed and plots were generated with FlowJo  
443 10.6 (BD Biosciences).

#### 444 **Sample preparations for metabolomics**

445 Cells were collected by centrifugation and washed twice with PBS, and the resulting pellet was  
446 stored at -80°C until extraction. For extraction, cell pellets were thawed on ice and lysed by 3  
447 cycles of freeze-thawing, including a 5-min sonication process in an ice-water bath during the  
448 thawing step. Then 40  $\mu$ L of the homogenate were put aside for protein quantification by the  
449 Bradford method for further normalization of the metabolite levels. Next, metabolites were  
450 extracted by mixing the lysate with methanol:chloroform at a final ratio of 1:2:2  
451 (water:methanol:chloroform), thoroughly vortexed, and incubated in ice with agitation for 10  
452 minutes. Then samples were centrifuged at 12,000 rpm for 20 min at 4°C. The two resulting phases

453 (upper aqueous polar and lower organic lipid) were separated, and the protein interface was  
454 discarded. Polar extracts were dried under a stream of N<sub>2</sub> and stored at -80°C until metabolomics  
455 analysis was performed. Tumor tissue was first weighed while frozen for normalization purposes  
456 and subsequently homogenized using a bullet blender homogenizer in the same solvent mixture  
457 described above and further processed in the same way as cell extracts. Cell culture medium was  
458 collected after centrifugation of cells (300 rcf, 5 min), extracted in ice-cold methanol, dried under  
459 N<sub>2</sub>, and resuspended in 180 µL of phosphate buffer (pH 7; 100 mM) in D<sub>2</sub>O (containing d-TSP)  
460 and 1% NaN<sub>3</sub> for nuclear magnetic resonance (NMR) spectroscopic analysis.

461 **NMR spectral acquisition and processing:** All spectra were acquired at 25°C on a Bruker  
462 Avance III 600 MHz spectrometer (Structural Biophysics Laboratory, NCI, Frederick, MD, USA)  
463 equipped with a cryogenically cooled probe. Single-pulse <sup>1</sup>H NMR experiments were performed  
464 using the noesygppr1d (TopSpin 3.5, Bruker Biospin) pulse sequence for water suppression. For  
465 each spectrum, 128 scans were acquired, with a relaxation delay of 3 s, a spectral width of 10,800  
466 Hz, and a time domain of 32K points. Spectra were referenced to the TSP internal standard signal  
467 (s, δ = 0.00 ppm), zero-filled to 64K points, phased, and baseline-corrected using ACD Labs  
468 Spectrus Processor 2016, and an exponential line-broadening function of 0.30 Hz was applied. For  
469 quantification, <sup>1</sup>H NMR resonance signals were normalized to the TSP singlet located at 0.00 ppm  
470 and corrected to either the total protein content as obtained from the Bradford assay, cell number,  
471 or tissue weight.

#### 472 **LC-MS acquisition and processing**

473 LC-MS analysis was conducted with an Agilent 6545 MS combined with a 1290 Infinity II  
474 UHPLC system. Only LC-MS-grade solvents and additives purchased from Covachem, LLC  
475 (Loves Park, IL, USA) were used to prepare mobile phases and wash solutions. Wash cycles



476 consisting of a strong wash (50% methanol, 25% isopropanol, and 25% water), weak wash (90%  
477 acetonitrile and 10% water), and seal wash (10% isopropanol and 90% water) were implemented  
478 to eliminate carryover between injections. Analytes were injected (8  $\mu$ L) and resolved using an  
479 Infinity 1290 in-line filter combined with an AdvanceBio Glycan Map 2.1 x 100 mm, 2.7  $\mu$ m  
480 column (Agilent Technologies, Wilmington, DE, USA) set at 35°C. The solvent buffers,  
481 consisting of mobile phase A (10 mM ammonium acetate in 88% water and 12% acetonitrile) and  
482 mobile phase B (10 mM ammonium acetate in 90% acetonitrile), were initially titrated with formic  
483 acid and ammonium hydroxide to pH 6.85. The linear gradient was executed at a flow rate of 0.3  
484 mL/min, as follows: 100% B, 0.5 min; 95% B, 2.0 min; 60% B, 3.0 min; 35% B, 5 min; hold 0.25  
485 min; 0% B, 6 min; hold 0.5 min; 100% B, 7.8 min. The mass analyzer acquisition conditions were  
486 as follows: drying gas temperature 250°C, sheath gas temperature 325°C, nebulizer 45 psig,  
487 skimmer 50 V, and octopole radio frequency 750 V. Mass spectra were acquired at 3.0 spectra/s  
488 in negative electrospray ionization (ESI) mode for a mass range from 72 to 1200 m/z using a  
489 voltage gradient of capillary 3000 V, nozzle 2000 V, and fragmentor 80 V.

490 Prior to preprocessing the datasets, pooled quality control samples were inspected for consistency  
491 of retention-time (RT) shifts and signal degradation. Following acquisition, m/z spectra binning  
492 was performed by partitioning the m/z vs. RT matrices into fixed width using an Agilent  
493 Masshunter Profinder B.08.00. Bins were manually inspected to confirm consistent, reproducible  
494 integration for all analytes of interest across all samples. Target extraction of precursor m/z was  
495 performed using an in-house compound library. Ion selection and alignment parameters were  
496 restricted to proton loss (H-) only, 5.0 mDa mass range, and RT  $\pm$  0.4 min. Following  
497 preprocessing, the ion areas were reported for each sample and corrected to the area of sample-  
498 specific internal standard, p-nitrobenzoate (added at 90 pmol/per sample during preparation).

499 The same acquisition procedure was followed for the  $^{13}\text{C}$  isotopically labeled samples. After  
500 alignment and identification of analytes of interest retention times a PCDL card was constructed  
501 using PCDL Manager B.07.00 (Agilent). The chromatograms were introduced into the Agilent  
502 MassHunter Profinder B.08.00, and the PCDL card was used in the Batch Isotopologue Extraction  
503 routine with the following parameters: 99%  $^{13}\text{C}$  labeling, 20% peak height ion abundance criteria,  
504 mass tolerance of  $\pm 15$  ppm + 2 mDa with a threshold of 250 counts for the anchor and 1000 counts  
505 for the sum of the ion heights with a minimum correlation coefficient greater than 0.5. The  
506 corrected and raw intensity and percentages of isotopologues of the analytes of interest were  
507 obtained. Metabolite levels obtained from the LC-MS analysis described above are displayed  
508 either as the percentage of the specific isotopologues over the total pool of the metabolite for  $^{13}\text{C}$   
509 tracing experiments or as protein/tissue-normalized intensities.

#### 510 **Metabolomic analyses**

511 Volcano plots were generated from the datasets obtained from the LC-MS analysis of the polar  
512 extracts of the 3 cell lines. Samples were labeled as control or cysteine/cystine-free. Then  $p$  values  
513 obtained by a  $t$ -test followed by Welch correction were adjusted for multiple comparisons by the  
514 false discovery rate (FDR) method. In addition, fold changes (FC) were computed for each  
515 metabolite to generate the plot, including  $-\text{Log}(\text{FDR-corrected } p \text{ values})$  vs  $\text{Log}_2(\text{FC})$ . Thresholds  
516 used to highlight dysregulated variables were  $\text{Log}_2(\text{FC}) > 1$  or  $< -1$  and FDR-corrected  $p$  values  $<$   
517 0.05. Volcano plots and PCA data were obtained by MetaboAnalyst 4.0 (55).

#### 518 **Western blots**

519 Samples were harvested and centrifuged at  $300 \times g$  for 3 min, washed with PBS, and lysed in a  
520 solution of the radioimmunoprecipitation (RIPA) buffer system (Santa Cruz Biotechnology, USA).  
521 After a 30-min incubation period and a brief sonication on ice, lysates were centrifuged at 14,000

522 x g for 10 min at 4°C. Total protein concentration of supernatants was then determined by BCA  
523 assay (Thermo Scientific). Samples were prepared for electrophoresis as 20-50 µg of protein,  
524 Laemmli sample buffer, and dithiothreitol (DTT). Protein samples were boiled at 95°C for 5 min  
525 and loaded into either 8-16% or 10% Mini-Protean TGX Precast Gels for separation by  
526 electrophoresis. Then proteins were transferred to nitrocellulose membranes using the Trans-Blot  
527 Turbo system. Blots were blocked for 1 hour at room temperature with 5% fat-free milk or milk-  
528 free blocking buffer (for analysis of phosphorylated proteins) and incubated overnight at 4°C with  
529 primary antibodies for p-GCN2 (Abcam, ab75836), p-eIF2α (Cell Signaling, #9721), α-tubuline  
530 (Cell Signaling, #2144), β-actin (Abcam, ab8227), cystathionine β-synthase (Abcam, ab135626),  
531 cystathioninase (Cell Signaling, #30068), glutamate-cysteine ligase regulatory subunit  
532 (Proteintech, 14241-1-AP), puromycin (EMD Millipore, MABE343), MTHFD1 (Proteintech,  
533 10794-1-AP), and glutathione reductase (Abcam, ab16801). Subsequently, the membrane was  
534 washed with Tris-buffered saline + Tween-20, incubated with horseradish peroxidase (HRP)-  
535 conjugated secondary antibodies for 1 h at room temperature and treated with Clarity Max Western  
536 ECL substrate. Blots were imaged on the Chemidoc MP imaging system (BioRad).

### 537 **GSH quantification**

538 GSH levels were computed using the GSH-Glo™ Glutathione Assay (Promega, USA) according  
539 to the protocol provided by the vendor. Then 24-well plates were seeded at 200,000–300,000 cells  
540 in 2 mL for 4 days. To normalize GSH levels, 0.5 mL was taken from each well prior to performing  
541 the assay, and the cells were counted by a ViCell XR automatic cell counter.

### 542 **Animal studies**

543 The intracranial orthotopic mouse model harboring the IDH1-mutant glioma cell line NCH1681  
544 was established according to approved animal study proposal NOB-008 by the National Cancer

545 Institute—Animal Use and Care Committee. Briefly, cells were harvested, washed with PBS, and  
546 counted. The resulting pellet was resuspended in Hank’s Balanced Salt Solution, and 5  $\mu$ L of the  
547 cell suspension were injected stereotactically into the striatum of 6–8-week-old female severe  
548 combined immunodeficient (SCID) mice (Charles River Frederick Research Model Facility) using  
549 a stereotactic device. Before the diet was initiated, mice were randomized and split into the control  
550 and the diet groups. The number of animals per group was determined by using G\*Power 2. The  
551 sample size (number of animals) was computed via a priori methods of calculation, assuming an  
552 alpha error probability of 0.05, power level of 0.95, and difference in mean survival between  
553 groups of 9 days. Neurological symptoms of mice were monitored daily to assess tumor growth;  
554 specifically, an external independent researcher assessed the health of the mice twice a day without  
555 previous knowledge of the experiment (blinded to the treatment). Once this researcher determined  
556 that a mouse was reaching end point, in view of the symptomatology, that mouse was euthanized.  
557 Symptoms include animal experiencing rapid weight loss (>15%, monitored daily), debilitating  
558 diarrhea, rough hair coat, hunched posture, labored breathing, lethargy, persistent recumbence,  
559 significantly abnormal neurological signs, bleeding from any orifice, self-induced trauma,  
560 impaired mobility, moribund, or otherwise unable to obtain food or water. To compare survival  
561 curves, the log-rank (Mantel–Cox) test was used (GraphPad Prism 7.05). Diets supplied to the  
562 mice were A05080217 (L-amino acid rodent diet without added cystine) and A18110101 (L-amino  
563 acid diet with 2 g L-cysteine and 2 g L-cystine per kg) from Research Diets Inc. (New Brunswick,  
564 NJ, USA). Prior to initiation of the experiment, control mice were fed with both diets to check  
565 whether there was active ingestion of food. Accordingly, food and animal weight were monitored  
566 twice a week, and stool was examined visually for incorporation of food dyes.

567 **<sup>13</sup>C-tracing *in vivo***

568  $^{13}\text{C}$  tracing experiments *in vivo* were performed as previously described (56-58) on the same mice  
569 utilized for survival analysis.  $^{13}\text{C}$ -U-glutamine was prepared as a 36.2 mg/mL stock solution in  
570 sterile PBS and injected (200  $\mu\text{L}$ , 7.24 mg) into the tail vein at 15-min intervals for 3 times (total  
571 = 142  $\mu\text{mol}$ ) just prior to mice reaching end point. Mice were euthanized 15 min after the last  
572 injection (45 min from the first injection). Tumors were separated from the brain, then both tumor  
573 and normal tissues were gently blotted by rapidly tapping the tissue onto a cloth and were  
574 immediately flash-frozen in liquid nitrogen.

### 575 **Plasma analysis**

576 Blood was collected from the tail vein of the mice in lithium-heparin collection tubes (Sarstedt,  
577 #41.1393.105). Approximately 35  $\mu\text{L}$  of blood was centrifuged, according to the tube  
578 manufacturer's instructions, at 4°C, and the clear plasma fraction was transferred to a clean  
579 microtube. Subsequently, plasma was extracted in a water:methanol:chloroform mixture,  
580 centrifuged for 20 min at 4°C and 13,000 rpm, and the resulting upper hydrophilic phase was then  
581 transferred to a clean vial and dried under a stream of  $\text{N}_2$ . Dried sediments were resuspended in  
582 methanol and injected into the LC-MS system for global profiling.

### 583 **Immunohistochemistry**

584 When mice reached end point, tissue was collected and stored in paraformaldehyde at 4°C. Tissue  
585 was submitted to HistoServ, Inc. for analysis together with the antibodies. Slides were  
586 deparaffinized and hydrated through graded alcohols to distilled water, followed by antigen  
587 retrieval. They were then blocked with hydrogen peroxide and a blocking serum. Next, the slides  
588 were incubated with the primary antibody, a secondary antibody, and HRP-conjugated  
589 streptavidin. Finally, the slides were developed using 3,3'-diaminobenzidine and counterstained  
590 with hematoxylin. All of the incubations were carried out at room temperature, with Tris-buffered

591 saline + Tween-20 used as a washing buffer. Immunostaining was quantified using ImageJ  
592 software.

### 593 **Statistical analysis and graphs**

594 Statistical significance was computed with R or Prism GraphPad 7.05. Multivariate analysis was  
595 performed using MetaboAnalyst 4.0 (59) and in-house R scripts. For each figure, “n” refers to the  
596 number of biological replicates. Exact p-values for those experiments in which statistical  
597 significance was assessed can be found in the supplementary files.

598

599 **Acknowledgments:** We thank Hua Song and Wei Zhang for their help with the animal work.

600

### 601 **References**

- 602 1. Yuneva M, Zamboni N, Oefner P, Sachidanandam R, Lazebnik Y. Deficiency in  
603 glutamine but not glucose induces MYC-dependent apoptosis in human cells. *J Cell Biol.*  
604 2007;178(1):93-105.
- 605 2. Wise DR, Thompson CB. Glutamine addiction: a new therapeutic target in cancer.  
606 *Trends Biochem Sci.* 2010;35(8):427-33.
- 607 3. Gao P, Tchernyshyov I, Chang TC, Lee YS, Kita K, Ochi T, et al. c-Myc suppression of  
608 miR-23a/b enhances mitochondrial glutaminase expression and glutamine metabolism. *Nature.*  
609 2009;458(7239):762-U100.
- 610 4. Sheen JH, Zoncu R, Kim D, Sabatini DM. Defective Regulation of Autophagy upon  
611 Leucine Deprivation Reveals a Targetable Liability of Human Melanoma Cells In Vitro and In  
612 Vivo. *Cancer Cell.* 2011;19(5):613-28.

- 613 5. Maddocks ODK, Athineos D, Cheung EC, Lee P, Zhang T, van den Broek NJF, et al.  
614 Modulating the therapeutic response of tumours to dietary serine and glycine starvation. *Nature*.  
615 2017;544(7650):372-6.
- 616 6. Gao X, Sanderson SM, Dai Z, Reid MA, Cooper DE, Lu M, et al. Dietary methionine  
617 influences therapy in mouse cancer models and alters human metabolism. *Nature*.  
618 2019;572(7769):397-401.
- 619 7. Kanarek N, Petrova B, Sabatini DM. Dietary modifications for enhanced cancer therapy.  
620 *Nature*. 2020;579(7800):507-17.
- 621 8. Panhans CM, Gresham G, Amaral LJ, Hu J. Exploring the Feasibility and Effects of a  
622 Ketogenic Diet in Patients With CNS Malignancies: A Retrospective Case Series. *Front*  
623 *Neurosci*. 2020;14:390.
- 624 9. Shi J, Zuo H, Ni L, Xia L, Zhao L, Gong M, et al. An IDH1 mutation inhibits growth of  
625 glioma cells via GSH depletion and ROS generation. *Neurol Sci*. 2014;35(6):839-45.
- 626 10. Molenaar RJ, Botman D, Smits MA, Hira VV, van Lith SA, Stap J, et al. Radioprotection  
627 of IDH1-Mutated Cancer Cells by the IDH1-Mutant Inhibitor AGI-5198. *Cancer Res*.  
628 2015;75(22):4790-802.
- 629 11. Liu Y, Lu Y, Celiku O, Li A, Wu Q, Zhou Y, et al. Targeting IDH1-Mutated  
630 Malignancies with NRF2 Blockade. *J Natl Cancer Inst*. 2019.
- 631 12. Yu D, Liu Y, Zhou Y, Ruiz-Rodado V, Larion M, Xu G, et al. Triptolide suppresses  
632 IDH1-mutated malignancy via Nrf2-driven glutathione metabolism. *Proc Natl Acad Sci U S A*.  
633 2020;117(18):9964-72.
- 634 13. Chawla RK, Lewis FW, Kutner MH, Bate DM, Roy RG, Rudman D. Plasma cysteine,  
635 cystine, and glutathione in cirrhosis. *Gastroenterology*. 1984;87(4):770-6.

- 636 14. Mosharov E, Cranford MR, Banerjee R. The quantitatively important relationship  
637 between homocysteine metabolism and glutathione synthesis by the transsulfuration pathway and  
638 its regulation by redox changes. *Biochemistry*. 2000;39(42):13005-11.
- 639 15. Vitvitsky V, Dayal S, Stabler S, Zhou Y, Wang H, Lentz SR, et al. Perturbations in  
640 homocysteine-linked redox homeostasis in a murine model for hyperhomocysteinemia. *Am J*  
641 *Physiol Regul Integr Comp Physiol*. 2004;287(1):R39-46.
- 642 16. Combs JA, DeNicola GM. The Non-Essential Amino Acid Cysteine Becomes Essential  
643 for Tumor Proliferation and Survival. *Cancers (Basel)*. 2019;11(5).
- 644 17. Achari AE, Jain SK. l-Cysteine supplementation increases insulin sensitivity mediated by  
645 upregulation of GSH and adiponectin in high glucose treated 3T3-L1 adipocytes. *Arch Biochem*  
646 *Biophys*. 2017;630:54-65.
- 647 18. Pavlova NN, Hui S, Ghergurovich JM, Fan J, Intlekofer AM, White RM, et al. As  
648 Extracellular Glutamine Levels Decline, Asparagine Becomes an Essential Amino Acid. *Cell*  
649 *Metabolism*. 2018;27(2):428-+.
- 650 19. Harding HP, Zhang Y, Zeng H, Novoa I, Lu PD, Calton M, et al. An integrated stress  
651 response regulates amino acid metabolism and resistance to oxidative stress. *Mol Cell*.  
652 2003;11(3):619-33.
- 653 20. Dever TE. Gene-specific regulation by general translation factors. *Cell*. 2002;108(4):545-  
654 56.
- 655 21. Schmidt EK, Clavarino G, Ceppi M, Pierre P. SUnSET, a nonradioactive method to  
656 monitor protein synthesis. *Nature Methods*. 2009;6(4):275-7.
- 657 22. Levy EJ, Anderson ME, Meister A. Transport of Glutathione Diethyl Ester into Human-  
658 Cells. *P Natl Acad Sci USA*. 1993;90(19):9171-5.



- 659 23. Wellner VP, Anderson ME, Puri RN, Jensen GL, Meister A. Radioprotection by  
660 Glutathione Ester - Transport of Glutathione Ester into Human Lymphoid-Cells and Fibroblasts.  
661 P Natl Acad Sci-Biol. 1984;81(15):4732-5.
- 662 24. Trachootham D, Zhou Y, Zhang H, Demizu Y, Chen Z, Pelicano H, et al. Selective  
663 killing of oncogenically transformed cells through a ROS-mediated mechanism by beta-  
664 phenylethyl isothiocyanate. *Cancer Cell*. 2006;10(3):241-52.
- 665 25. Stockwell BR, Friedmann Angeli JP, Bayir H, Bush AI, Conrad M, Dixon SJ, et al.  
666 Ferroptosis: A Regulated Cell Death Nexus Linking Metabolism, Redox Biology, and Disease.  
667 *Cell*. 2017;171(2):273-85.
- 668 26. Circu ML, Aw TY. Reactive oxygen species, cellular redox systems, and apoptosis. *Free*  
669 *Radic Biol Med*. 2010;48(6):749-62.
- 670 27. Chen L, Xu B, Liu L, Luo Y, Zhou H, Chen W, et al. Cadmium induction of reactive  
671 oxygen species activates the mTOR pathway, leading to neuronal cell death. *Free Radic Biol*  
672 *Med*. 2011;50(5):624-32.
- 673 28. Maddocks ODK, Labuschagne CF, Adams PD, Vousden KH. Serine Metabolism  
674 Supports the Methionine Cycle and DNA/RNA Methylation through De Novo ATP Synthesis in  
675 Cancer Cells. *Mol Cell*. 2016;61(2):210-21.
- 676 29. Bauerle MR, Schwalm EL, Booker SJ. Mechanistic diversity of radical S-  
677 adenosylmethionine (SAM)-dependent methylation. *J Biol Chem*. 2015;290(7):3995-4002.
- 678 30. Caudill MA, Wang JC, Melnyk S, Pogribny IP, Jernigan S, Collins MD, et al.  
679 Intracellular S-adenosylhomocysteine concentrations predict global DNA hypomethylation in  
680 tissues of methyl-deficient cystathionine beta-synthase heterozygous mice. *J Nutr*.  
681 2001;131(11):2811-8.

- 682 31. Muir A, Danai LV, Gui DY, Waingarten CY, Lewis CA, Vander Heiden MG.  
683 Environmental cystine drives glutamine anaplerosis and sensitizes cancer cells to glutaminase  
684 inhibition. *Elife*. 2017;6.
- 685 32. Ying W. NAD<sup>+</sup>/NADH and NADP<sup>+</sup>/NADPH in cellular functions and cell death:  
686 regulation and biological consequences. *Antioxid Redox Signal*. 2008;10(2):179-206.
- 687 33. Harris IS, Treloar AE, Inoue S, Sasaki M, Gorrini C, Lee KC, et al. Glutathione and  
688 thioredoxin antioxidant pathways synergize to drive cancer initiation and progression. *Cancer*  
689 *Cell*. 2015;27(2):211-22.
- 690 34. Chen MS, Wang SF, Hsu CY, Yin PH, Yeh TS, Lee HC, et al. CHAC1 degradation of  
691 glutathione enhances cystine-starvation-induced necroptosis and ferroptosis in human triple  
692 negative breast cancer cells via the GCN2-eIF2 $\alpha$ -ATF4 pathway. *Oncotarget*.  
693 2017;8(70):114588-602.
- 694 35. Dickhout JG, Carlisle RE, Jerome DE, Mohammed-Ali Z, Jiang H, Yang G, et al.  
695 Integrated stress response modulates cellular redox state via induction of cystathionine gamma-  
696 lyase: cross-talk between integrated stress response and thiol metabolism. *J Biol Chem*.  
697 2012;287(10):7603-14.
- 698 36. McBrayer SK, Mayers JR, DiNatale GJ, Shi DD, Khanal J, Chakraborty AA, et al.  
699 Transaminase Inhibition by 2-Hydroxyglutarate Impairs Glutamate Biosynthesis and Redox  
700 Homeostasis in Glioma. *Cell*. 2018;175(1):101-16.
- 701 37. Zhu Z, Du S, Du Y, Ren J, Ying G, Yan Z. Glutathione reductase mediates drug  
702 resistance in glioblastoma cells by regulating redox homeostasis. *J Neurochem*. 2018;144(1):93-  
703 104.

- 704 38. Venneti S, Dunphy MP, Zhang H, Pitter KL, Zanzonico P, Campos C, et al. Glutamine-  
705 based PET imaging facilitates enhanced metabolic evaluation of gliomas in vivo. *Sci Transl*  
706 *Med.* 2015;7(274):274ra17.
- 707 39. Bansal A, Simon MC. Glutathione metabolism in cancer progression and treatment  
708 resistance. *J Cell Biol.* 2018;217(7):2291-8.
- 709 40. Zhu JJ, Berisa M, Schworer S, Qin WG, Cross JR, Thompson CB. Transsulfuration  
710 Activity Can Support Cell Growth upon Extracellular Cysteine Limitation. *Cell Metabolism.*  
711 2019;30(5):865-+.
- 712 41. Cramer SL, Saha A, Liu JY, Tadi S, Tiziani S, Yan WP, et al. Systemic depletion of L-  
713 cyst(e)ine with cyst(e)inase increases reactive oxygen species and suppresses tumor growth. *Nat*  
714 *Med.* 2017;23(1):120-7.
- 715 42. Kshattray S, Saha A, Gries P, Tiziani S, Stone E, Georgiou G, et al. Enzyme-mediated  
716 depletion of l-cyst(e)ine synergizes with thioredoxin reductase inhibition for suppression of  
717 pancreatic tumor growth. *NPJ Precis Oncol.* 2019;3:16.
- 718 43. Tang X, Wu J, Ding CK, Lu M, Keenan MM, Lin CC, et al. Cystine Deprivation Triggers  
719 Programmed Necrosis in VHL-Deficient Renal Cell Carcinomas. *Cancer Res.* 2016;76(7):1892-  
720 903.
- 721 44. Zhang W, Trachootham D, Liu JY, Chen G, Pelicano H, Garcia-Prieto C, et al. Stromal  
722 control of cystine metabolism promotes cancer cell survival in chronic lymphocytic leukaemia.  
723 *Nat Cell Biol.* 2012;14(3):276-+.
- 724 45. Finkelstein JD. Metabolic regulatory properties of S-adenosylmethionine and S-  
725 adenosylhomocysteine. *Clin Chem Lab Med.* 2007;45(12):1694-9.

- 726 46. Yan SK, Chang T, Wang H, Wu L, Wang R, Meng QH. Effects of hydrogen sulfide on  
727 homocysteine-induced oxidative stress in vascular smooth muscle cells. *Biochem Biophys Res*  
728 *Commun.* 2006;351(2):485-91.
- 729 47. Zhang T, Bauer C, Newman AC, Uribe AH, Athineos D, Blyth K, et al. Polyamine  
730 pathway activity promotes cysteine essentiality in cancer cells. *Nat Metab.* 2020.
- 731 48. LeBoeuf SE, Wu WL, Karakousi TR, Karadal B, Jackson SR, Davidson SM, et al.  
732 Activation of Oxidative Stress Response in Cancer Generates a Druggable Dependency on  
733 Exogenous Non-essential Amino Acids. *Cell Metab.* 2020;31(2):339-50 e4.
- 734 49. Nelson BS, Lin L, Kremer DM, Sousa CM, Cotta-Ramusino C, Myers A, et al. Tissue of  
735 origin dictates GOT1 dependence and confers synthetic lethality to radiotherapy. *Cancer &*  
736 *metabolism.* 2020;8:1.
- 737 50. Villablanca JG, Volchenboum SL, Cho H, Kang MH, Cohn SL, Anderson CP, et al. A  
738 Phase I New Approaches to Neuroblastoma Therapy Study of Buthionine Sulfoximine and  
739 Melphalan With Autologous Stem Cells for Recurrent/Refractory High-Risk Neuroblastoma.  
740 *Pediatr Blood Cancer.* 2016;63(8):1349-56.
- 741 51. Ogiwara H, Takahashi K, Sasaki M, Kuroda T, Yoshida H, Watanabe R, et al. Targeting  
742 the Vulnerability of Glutathione Metabolism in ARID1A-Deficient Cancers. *Cancer Cell.*  
743 2019;35(2):177-+.
- 744 52. Badgley MA, Kremer DM, Maurer HC, DelGiorno KE, Lee HJ, Purohit V, et al.  
745 Cysteine depletion induces pancreatic tumor ferroptosis in mice. *Science.* 2020;368(6486):85-9.
- 746 53. Rohle D, Popovici-Muller J, Palaskas N, Turcan S, Grommes C, Campos C, et al. An  
747 Inhibitor of Mutant IDH1 Delays Growth and Promotes Differentiation of Glioma Cells. *Science.*  
748 2013;340(6132):626-30.

- 749 54. Dettling S, Stamova S, Warta R, Schnolzer M, Rapp C, Rathinasamy A, et al.  
750 Identification of CRKII, CFL1, CNTN1, NME2, and TKT as Novel and Frequent T-Cell Targets  
751 in Human IDH-Mutant Glioma. *Clin Cancer Res.* 2018;24(12):2951-62.
- 752 55. Chong J, Soufan O, Li C, Caraus I, Li S, Bourque G, et al. MetaboAnalyst 4.0: towards  
753 more transparent and integrative metabolomics analysis. *Nucleic Acids Res.*  
754 2018;46(W1):W486-W94.
- 755 56. Ren L, Ruiz-Rodado V, Dowdy T, Huang S, Issaq SH, Beck J, et al. Glutaminase-1  
756 (GLS1) inhibition limits metastatic progression in osteosarcoma. *Cancer & metabolism.*  
757 2020;8:4.
- 758 57. Lane AN, Yan J, Fan TW. (13)C Tracer Studies of Metabolism in Mouse Tumor  
759 Xenografts. *Bio Protoc.* 2015;5(22).
- 760 58. Ruiz-Rodado V, Seki T, Dowdy T, Lita A, Zhang M, Han S, et al. Metabolic Landscape  
761 of a Genetically Engineered Mouse Model of IDH1 Mutant Glioma. *Cancers (Basel).*  
762 2020;12(6).
- 763 59. Chong J, Xia J. Using MetaboAnalyst 4.0 for Metabolomics Data Analysis,  
764 Interpretation, and Integration with Other Omics Data. *Methods Mol Biol.* 2020;2104:337-60.  
765  
766  
767  
768  
769  
770  
771

772 **Supplementary Materials**

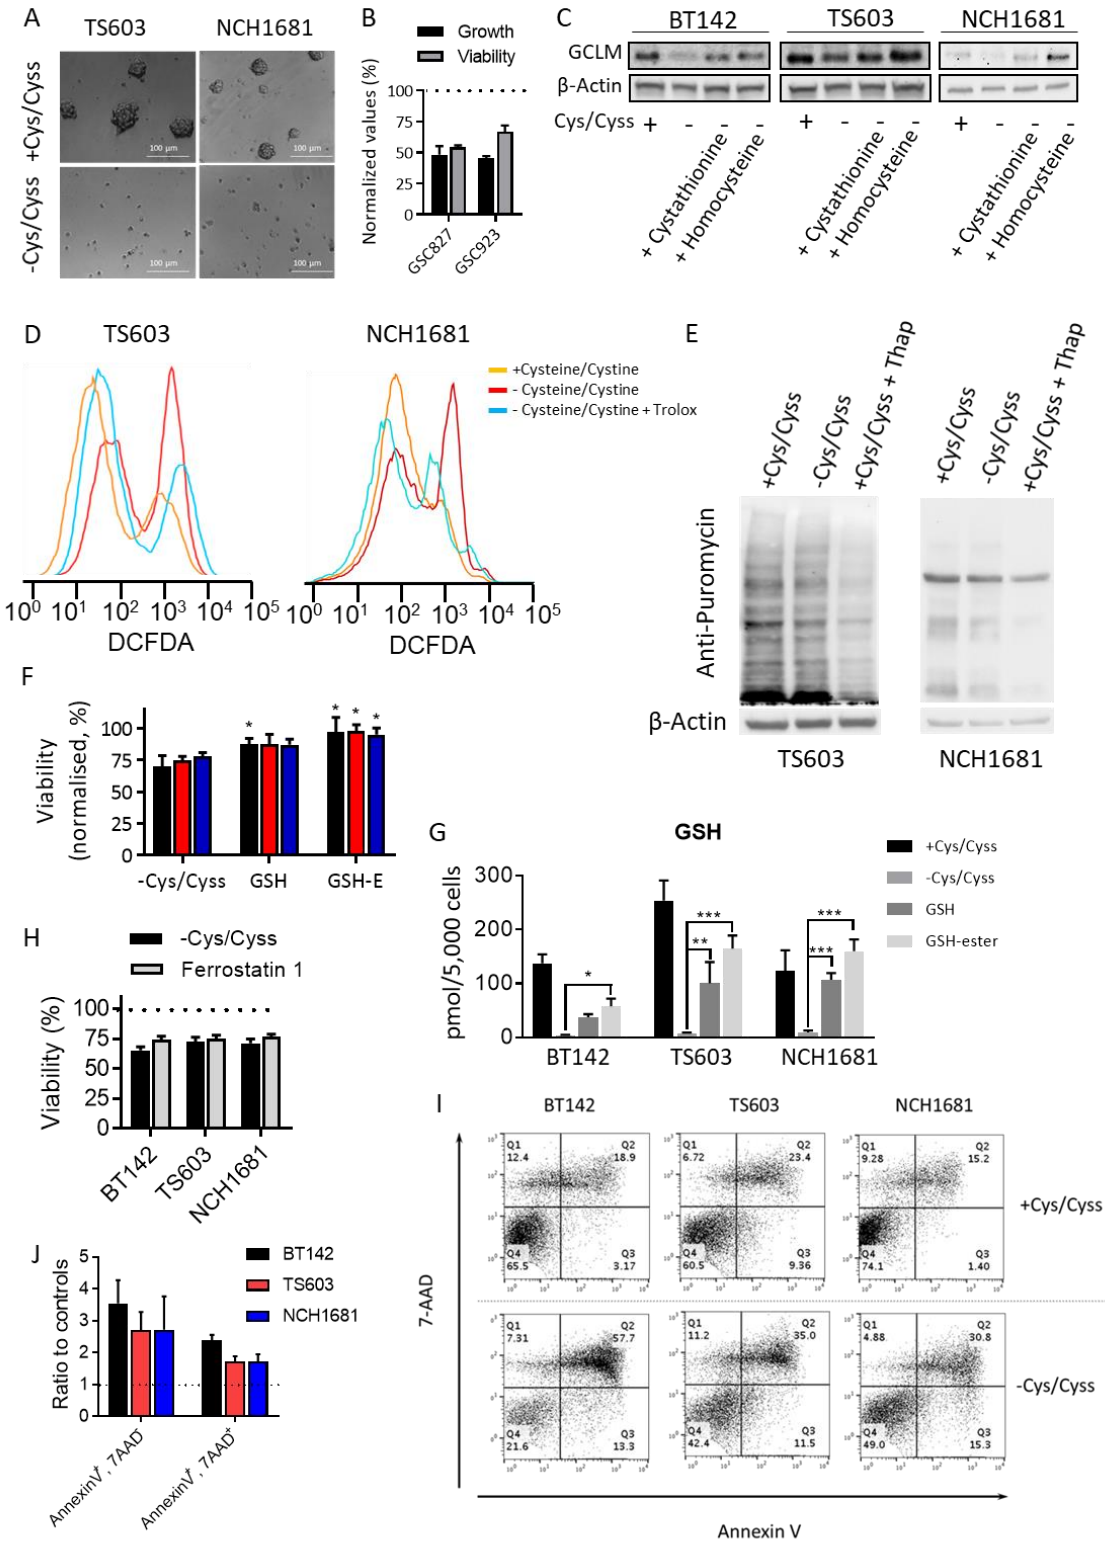

774 **Figure S1:** (A) Sphere formation of glioma cell lines after 96 hours of growth in medium with/out  
775 cysteine/cystine. Representative pictures are shown. (B) Growth and viability of IDH1-wildtype  
776 glioma cell lines under cysteine/cystine-deprivation for 96 hours ( $n = 3$ , bar plots show mean  $\pm$  SD  
777 normalized to results from experiments performed in full medium). (C) Western blots of glutamate  
778 cysteine ligase modulatory subunit (GCLM) for 3 IDH1-mutant glioma cell lines grown in medium  
779 without cysteine/cystine and treated with 0.1 mM cystathionine or homocysteine. (D) DCFDA  
780 area as a marker of ROS in glioma cell lines under cysteine/cystine deprivation and treated with  
781 0.25 mM Trolox. (E) Puromycin-labeled proteins detected by western blotting. (F) Viability of  
782 glioma cell lines in cysteine/cystine-lacking medium supplemented with either GSH or GSH-ethyl  
783 ester (mean  $\pm$  SD for  $n = 3$ ;  $*p < 0.05$  versus control by two-tailed Student's *t*-test) and (G)  
784 quantification of intracellular GSH (mean  $\pm$  SD for  $n = 3$ ;  $*$ ,  $p < 0.05$ ;  $**p < 0.005$ ;  $***p < 0.001$   
785 from a one-way ANOVA followed by Tukey's multiple comparison test for cells grown in  
786 cysteine/cystine-free medium vs those grown in the same medium plus either GSH or GSH ethyl  
787 ester). (H) Viability of glioma cell lines after 96 hours in medium lacking cysteine/cystine and in  
788 the same medium but treated with 2  $\mu$ M ferrostatin 1 ( $n = 3$ , bar plots show mean  $\pm$  SD normalized  
789 to results from experiments performed in full medium). (I) Apoptosis detection assay diagrams at  
790 96 hours and (J) the corresponding quantification of the number of cells assigned to early apoptosis  
791 and apoptosis ( $n = 3$ , bar plots show mean  $\pm$  SD normalized to results from experiments performed  
792 in full medium).

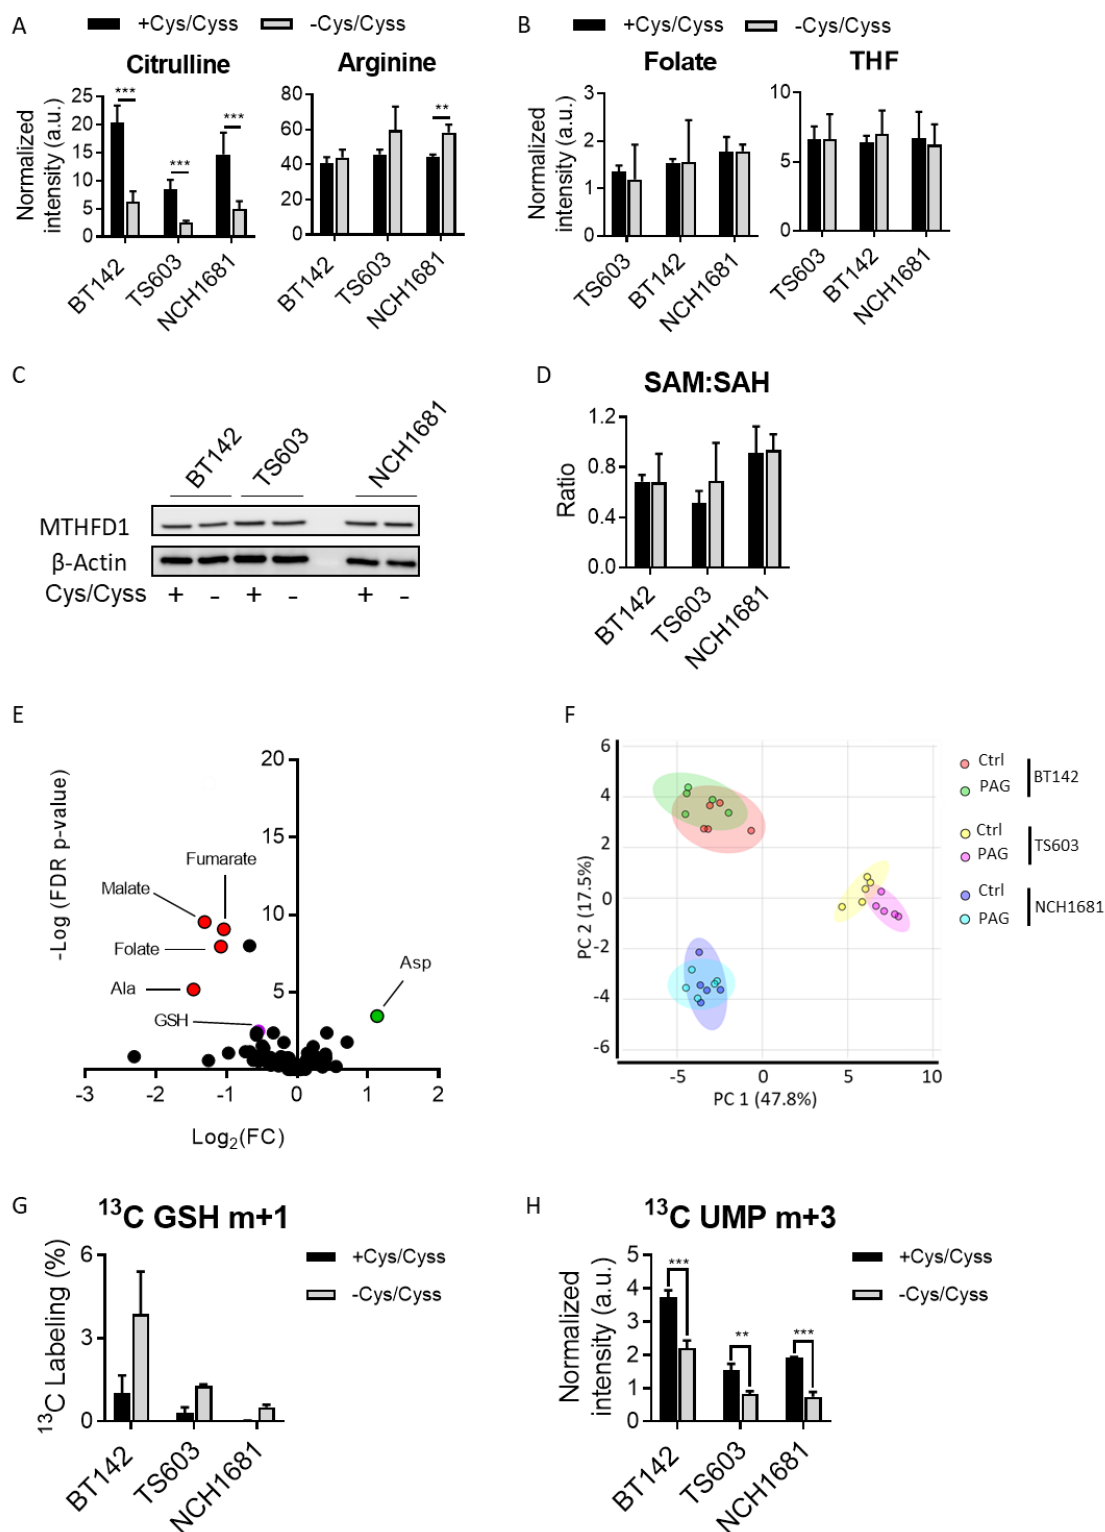

793

794 **Figure S2:** (A) Levels of citruilline, arginine, and (B) tetrahydrofolate (THF) and folate for the 3  
 795 cell lines grown in full and cysteine/cystine-lacking media for 48 hours. Metabolite levels are



796 computed from the LC-MS metabolic profiling experiment ( $n = 5$ , bar plots show mean values  $\pm$   
797 SD,  $p$  values from a  $t$ -test adjusted for multiple comparisons by the FDR method.  $**p < 0.005$ ;  
798  $***p < 0.001$ ). (C) Western blot of methyltetrahydrofolate dehydrogenase 1 (MTHFD1) as a  
799 marker of folate cycle activity. (D) Ratio of S-adenosylmethionine (SAM) and S-  
800 adenosylhomocysteine (SAH) for the 3 IDH1-mutant glioma cell lines computed from the LC-MS  
801 metabolic profiling experiment ( $n = 5$ , bar plots show mean values  $\pm$  SD). (E) Volcano plot of the  
802 glioma cell lines treated with 1 mM propargylglycine (PAG) vs. controls. Only metabolites that  
803 surpassed the thresholds established as FDR-corrected  $p < 0.05$  and  $\text{Log}_2(\text{FC}) > 1$  or  $< -1$  are  
804 highlighted (red, downregulated metabolites; green, upregulated metabolites) in addition to  
805 glutathione (GSH). (F) PCA scores plot using Log-transformed metabolites levels detected by LC-  
806 MS; 95% confidence ellipses are shown as colored ovals for each cell line and condition (treatment  
807 with 1 mM PAG). (G) Percentage of m+1 glutathione (GSH) isotopologue over the total pool of  
808 GSH from  $^{13}\text{C}$ -C3-serine (bar plots are mean  $\pm$  SD,  $n = 3$ ). (H)  $^{13}\text{C}$  incorporation from  $^{13}\text{C}$ -U-  
809 glutamine into uridine monophosphate (UMP) as the m+3 isotopologue (bar plots are mean  $\pm$  SD,  
810  $n = 3$ ;  $**p < 0.005$ ,  $***p < 0.001$ , two-tailed Student's  $t$ -test).

811

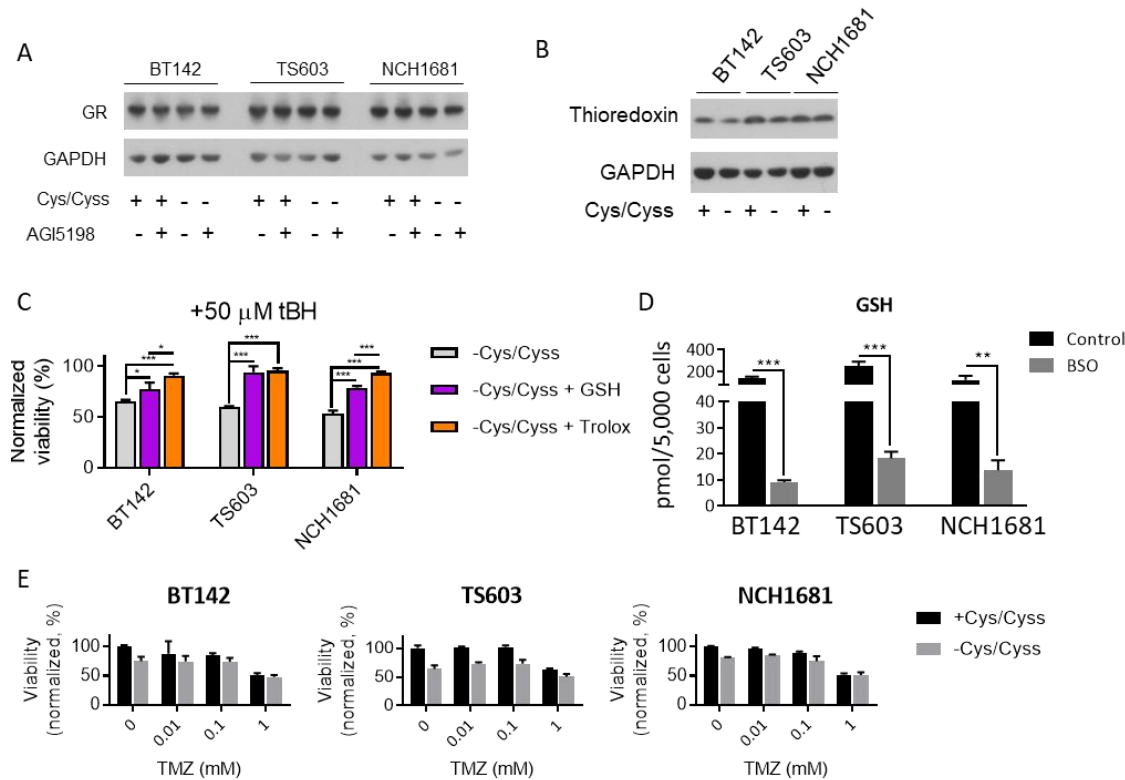

812

813 **Figure S3:** (A) Western blot of glutathione reductase at the different conditions depicted in the

814 figure. (B) and thioredoxin. (C) Normalized viability of the 3 IDH1-mutant glioma cell lines

815 treated with 50  $\mu$ M of tBH for 24 hours in medium spiked with 0.1 mM of GSH or 0.25 mM Trolox

816 (bar plots are mean  $\pm$  SD, n = 3; \* $p$  < 0.05, \*\*\* $p$  < 0.001, one-way ANOVA followed by Tukey's

817 multiple comparisons test). (D) Quantification of GSH levels after treatment with 250  $\mu$ M BSO

818 (bar plots are mean  $\pm$  SD, n = 3; \*\* $p$  < 0.005; \*\*\* $p$  < 0.001, two-tailed Student's  $t$ -test). (E)

819 Normalized viability of the 3 IDH1-mutant glioma cell lines treated with temozolomide (TMZ)

820 for 96 hours in full medium and medium lacking cysteine/cystine. No significant differences (by

821 two-way ANOVA) were found between the cells grown in medium lacking cysteine/cystine and

822 the combination with any of the TMZ concentrations.

823

824

825

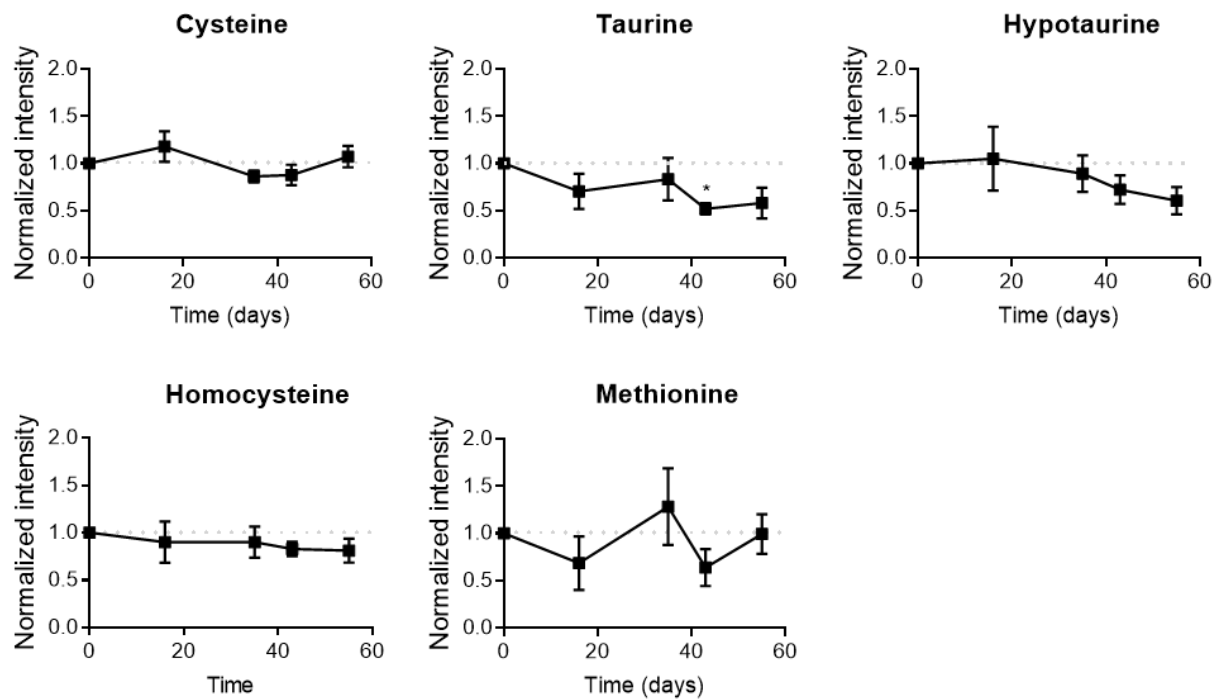

826

827 **Supplementary Figure 4:** Normalized intensities of cysteine-related metabolites in plasma  
828 collected from a mouse model of glioma and normalized to those computed for the control group  
829 (dotted line, reference values of the control group; metabolite levels for the cysteine/cystine-free  
830 diet group are shown as mean  $\pm$  SEM;  $n = 5$ ;  $*p < 0.05$  by two-tailed Student's  $t$ -test with Welch's  
831 correction).

832

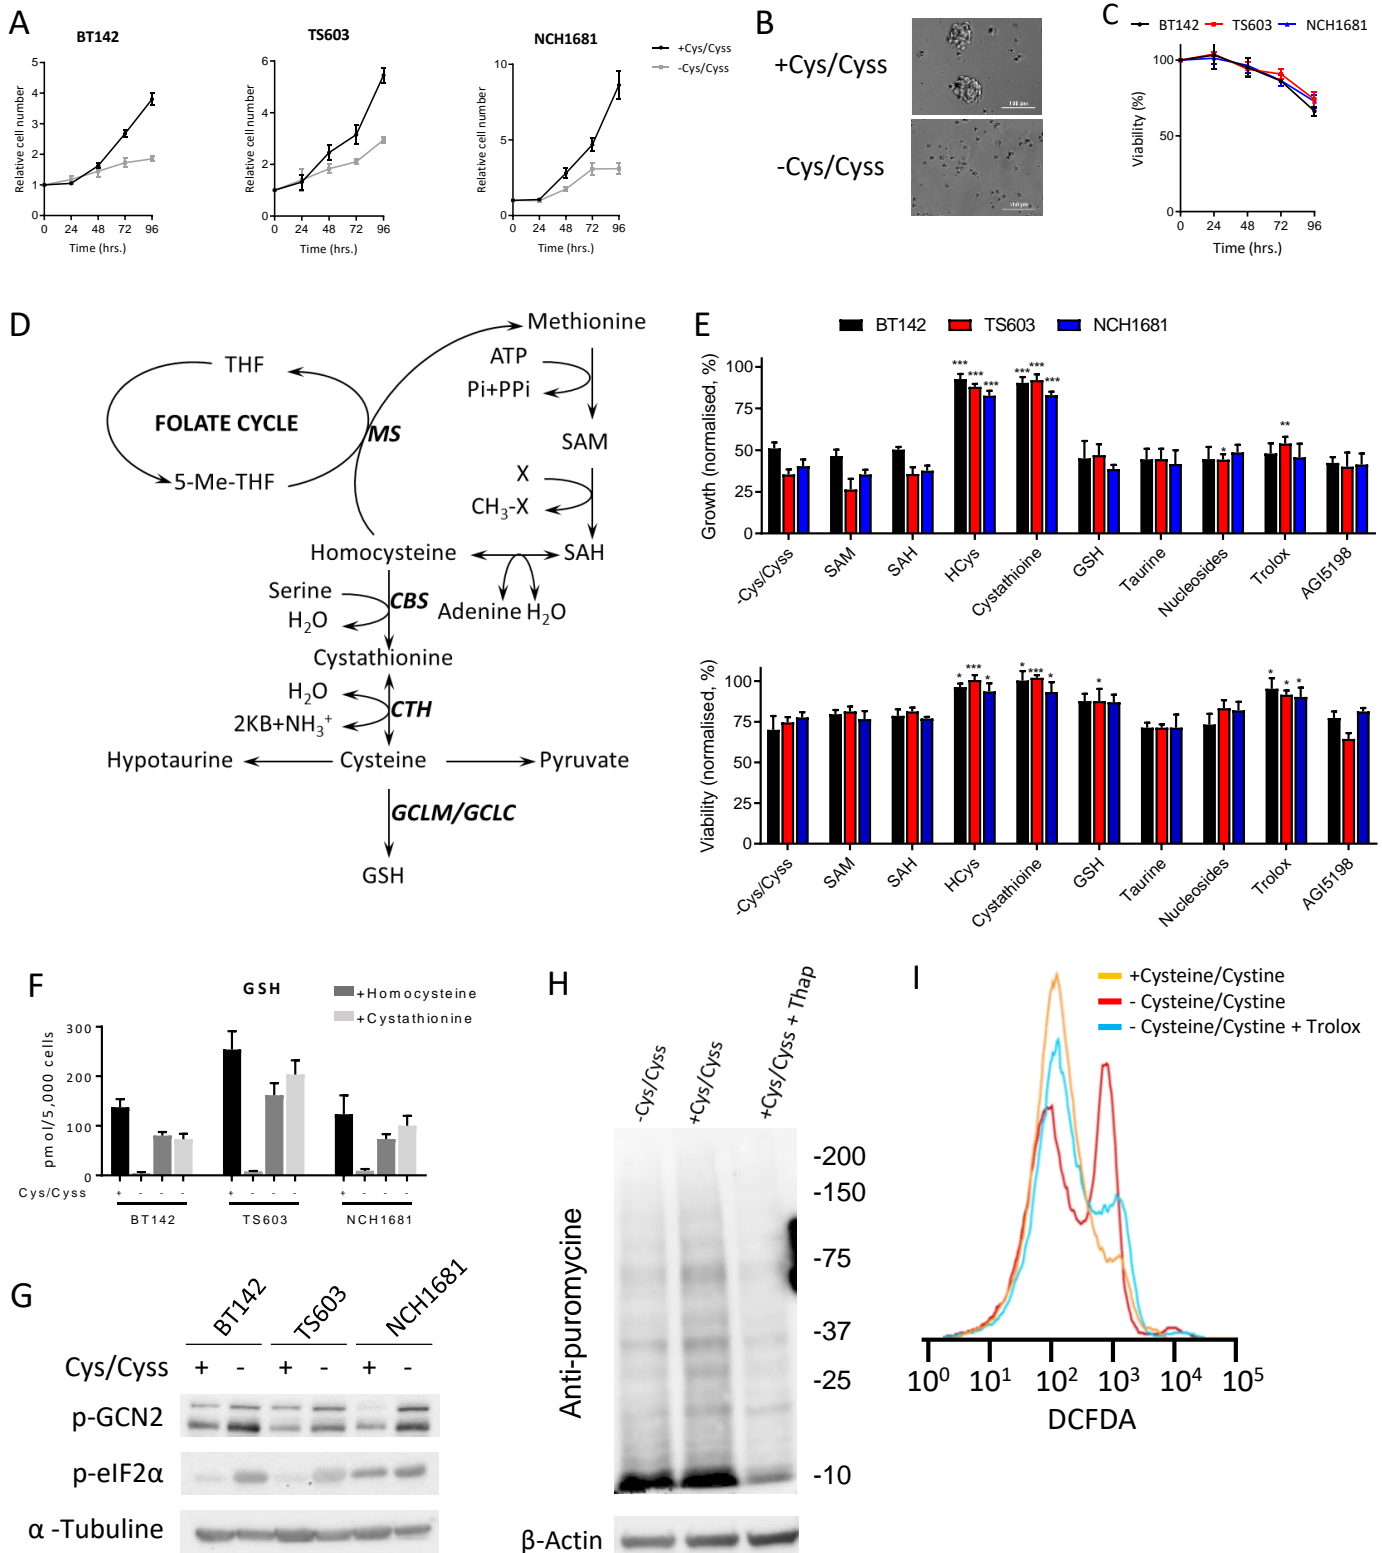

# SUPPLEMENTARY FIGURE 1

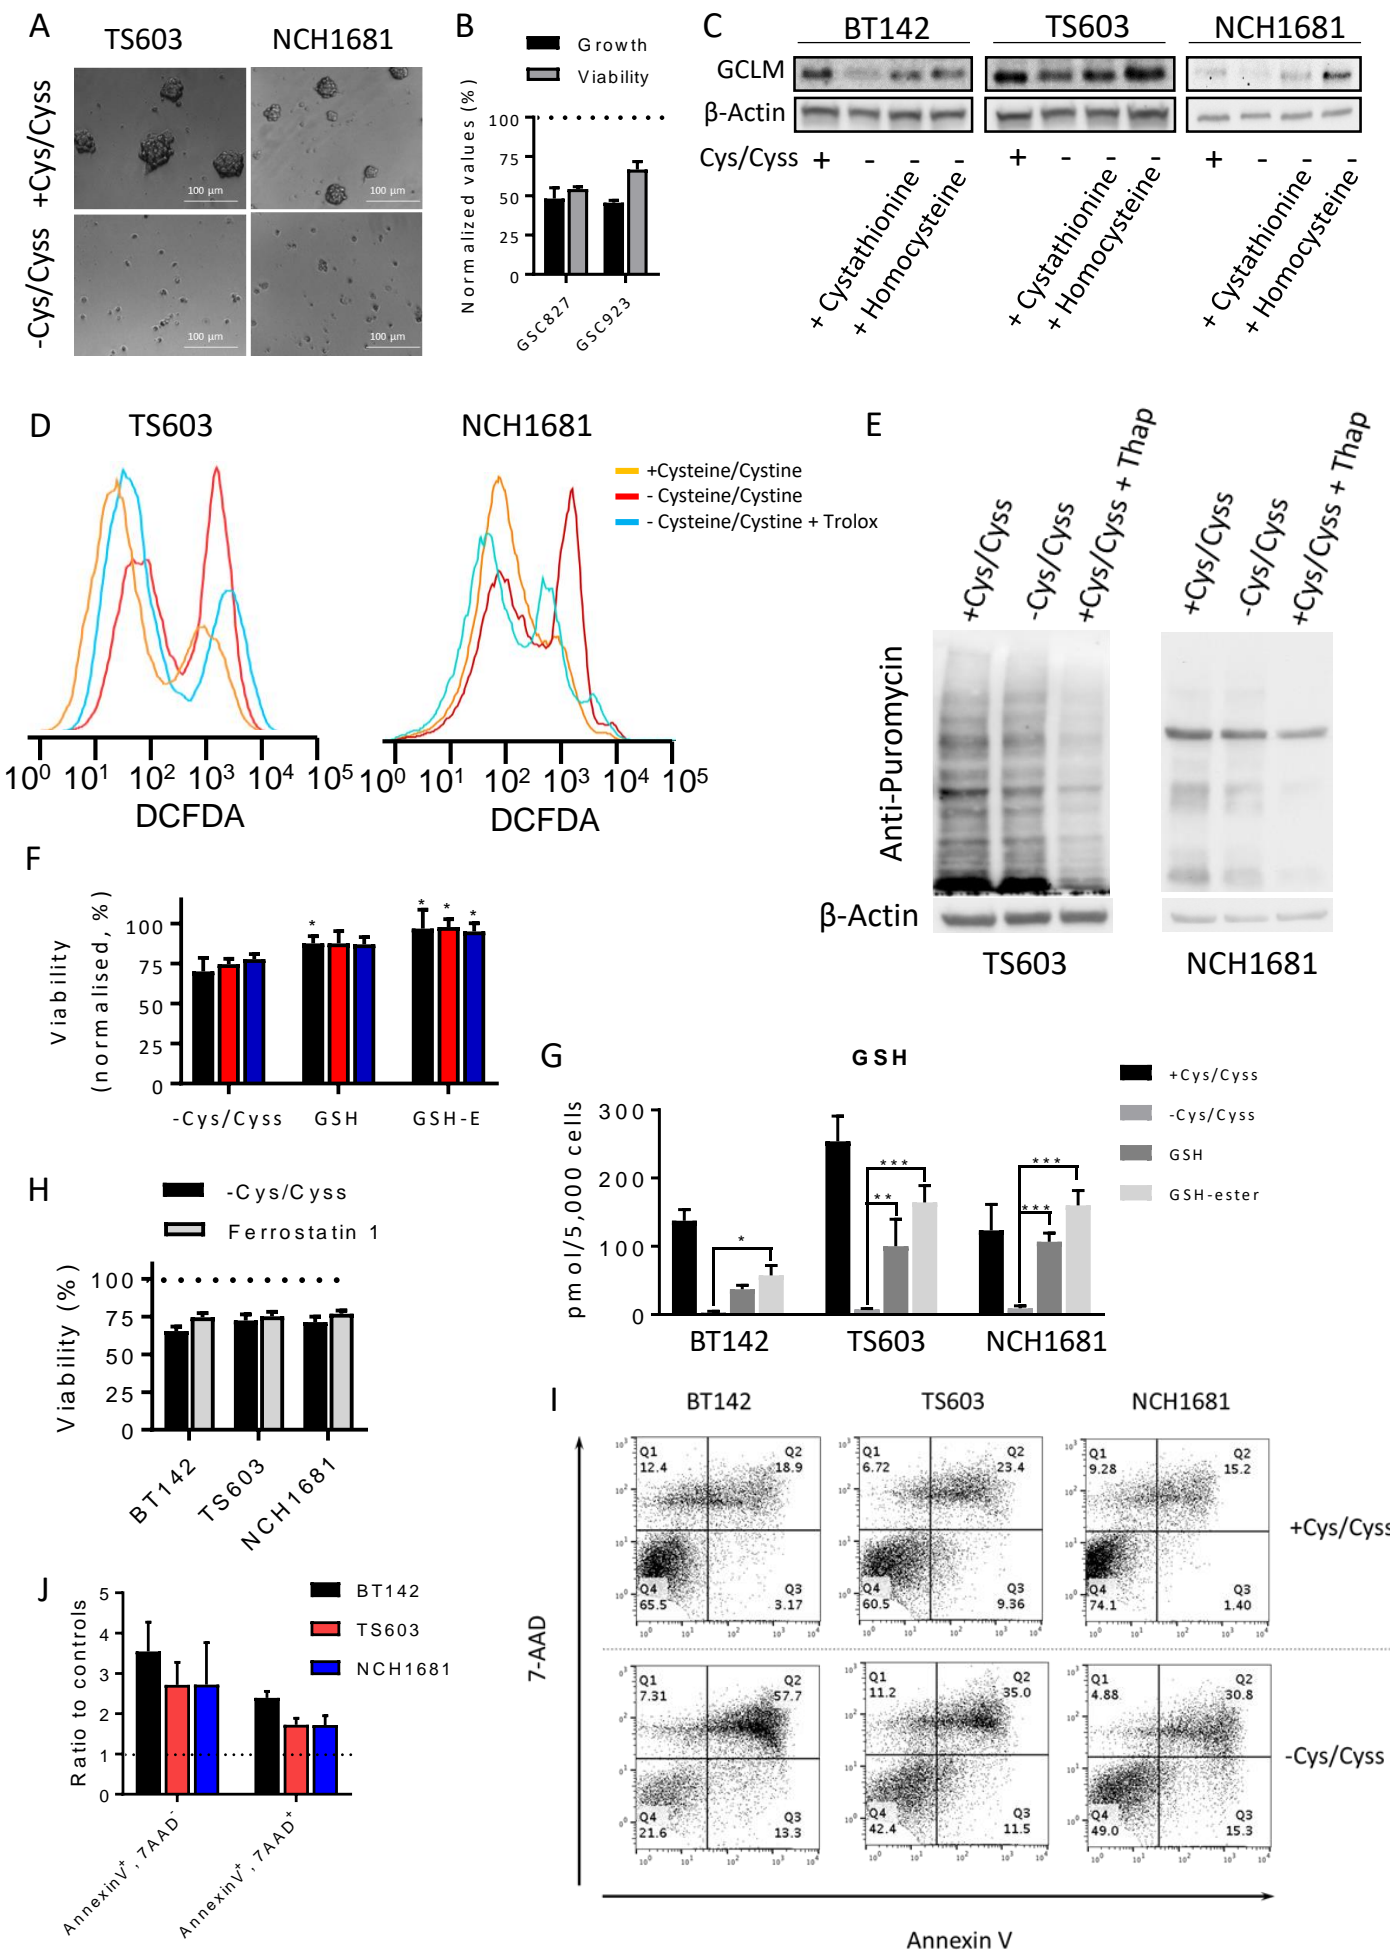

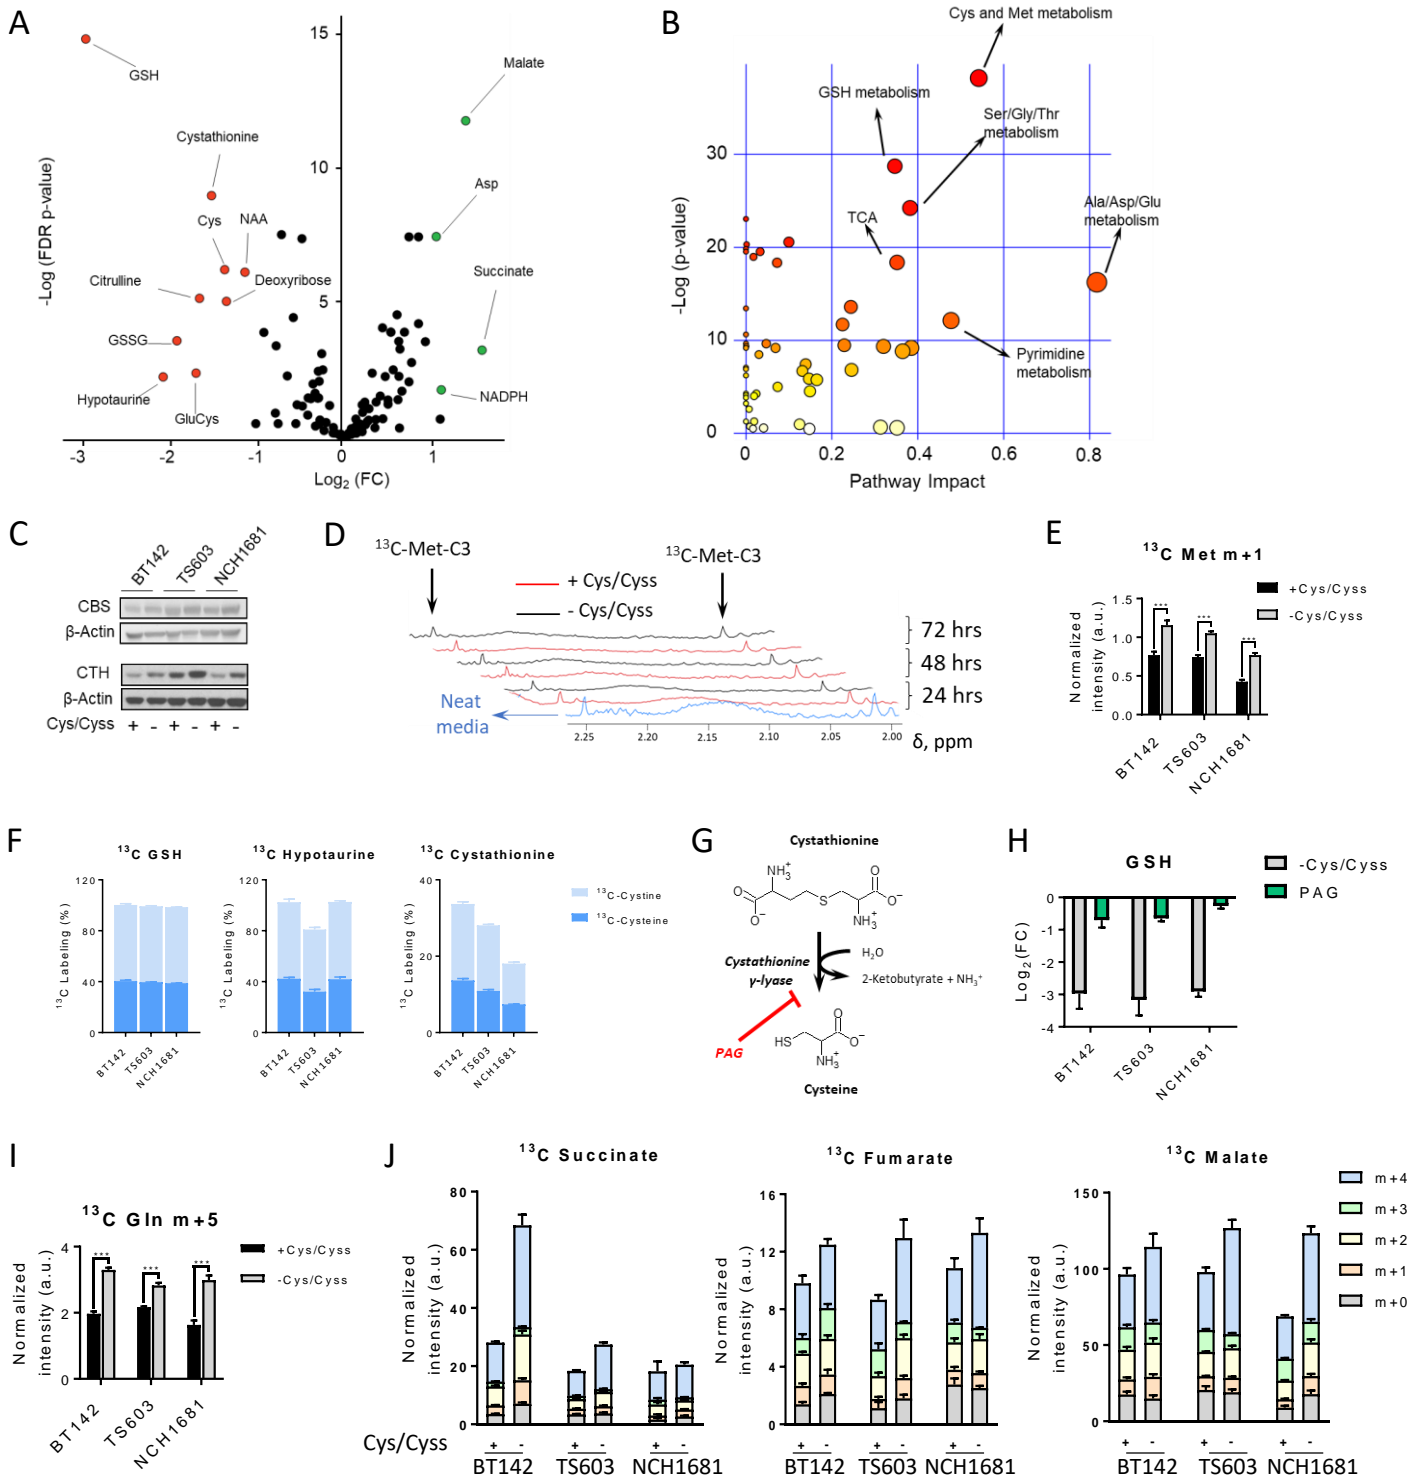

# SUPPLEMENTARY FIGURE 2

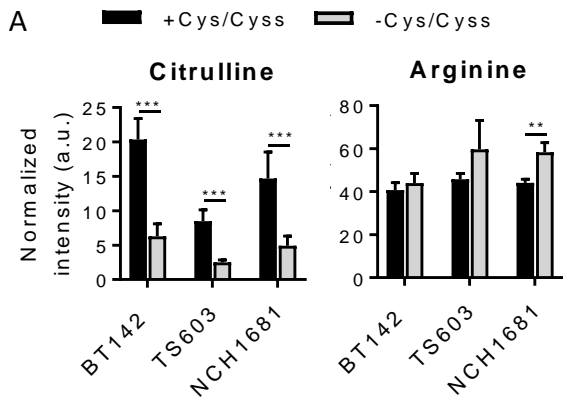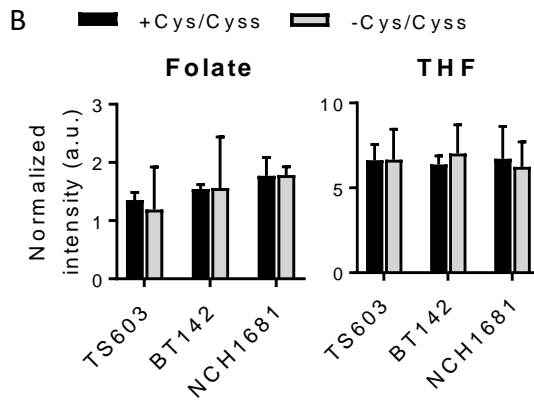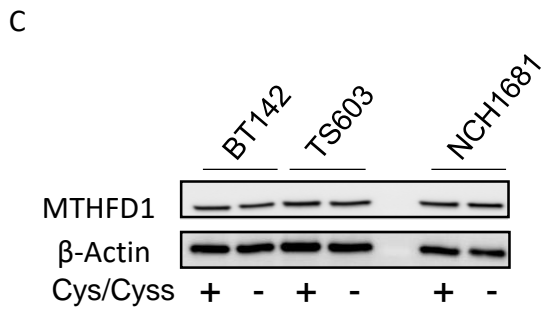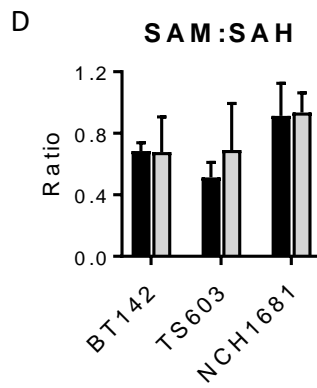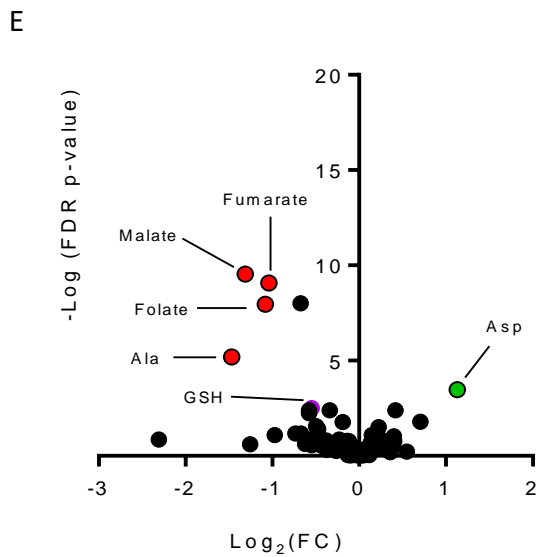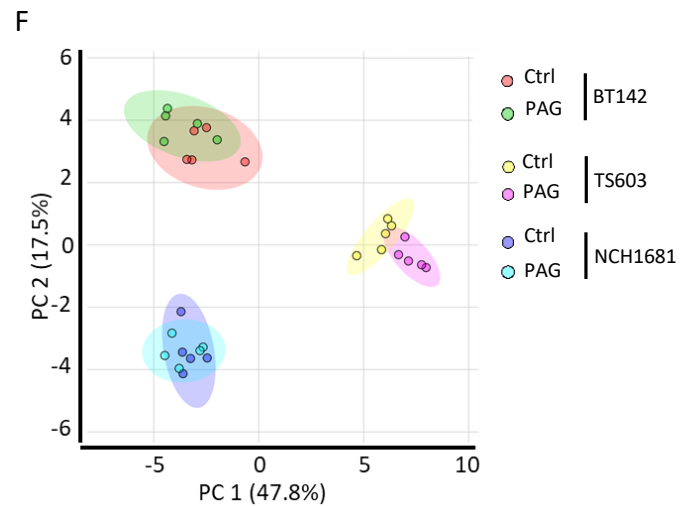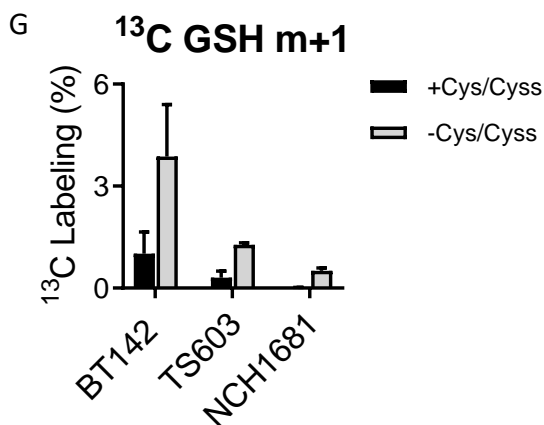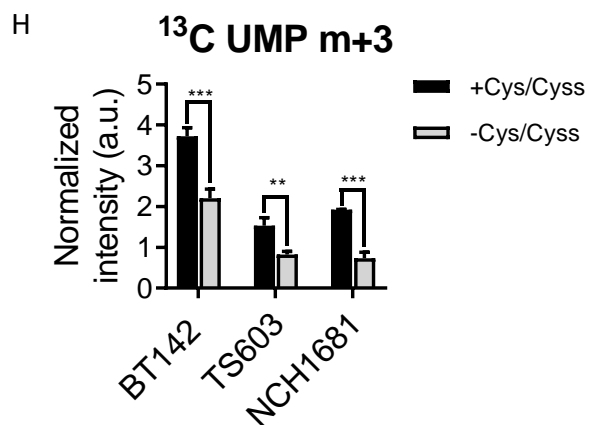

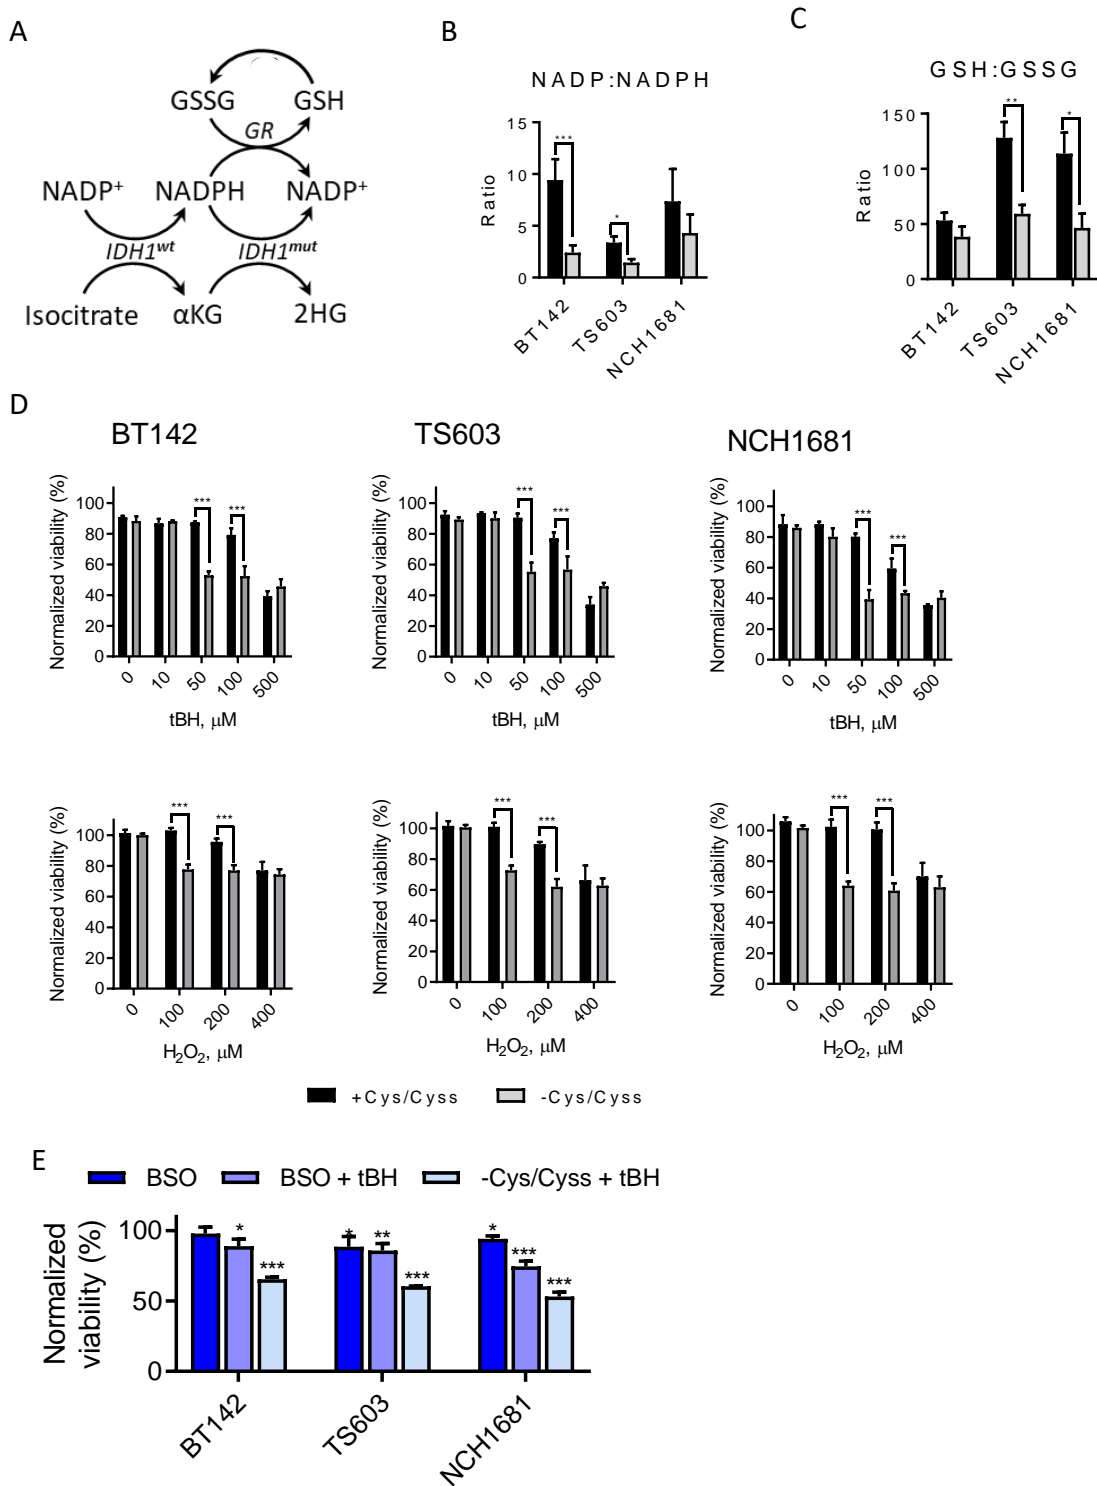



# SUPPLEMENTARY FIGURE 3

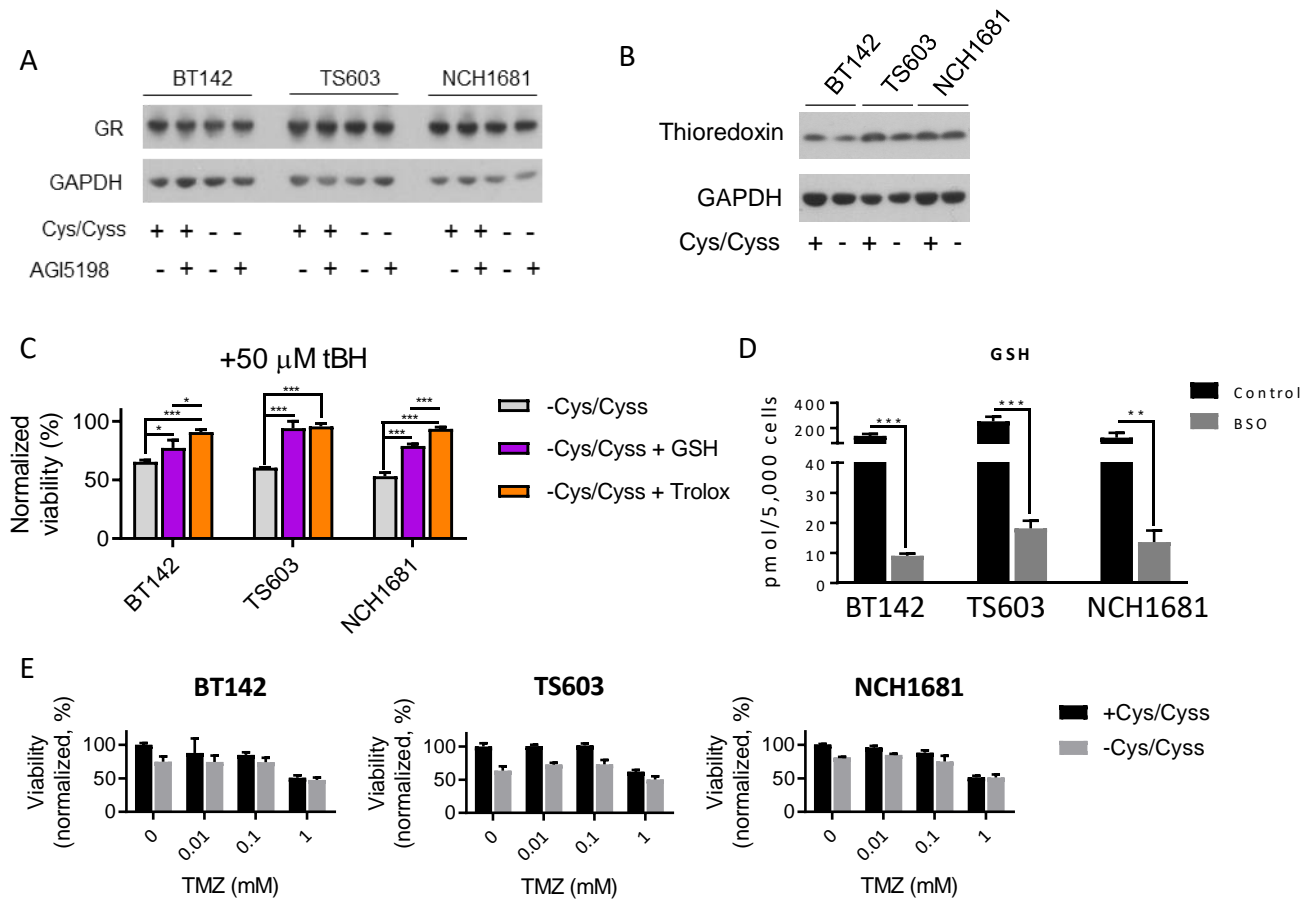

# FIGURE 4

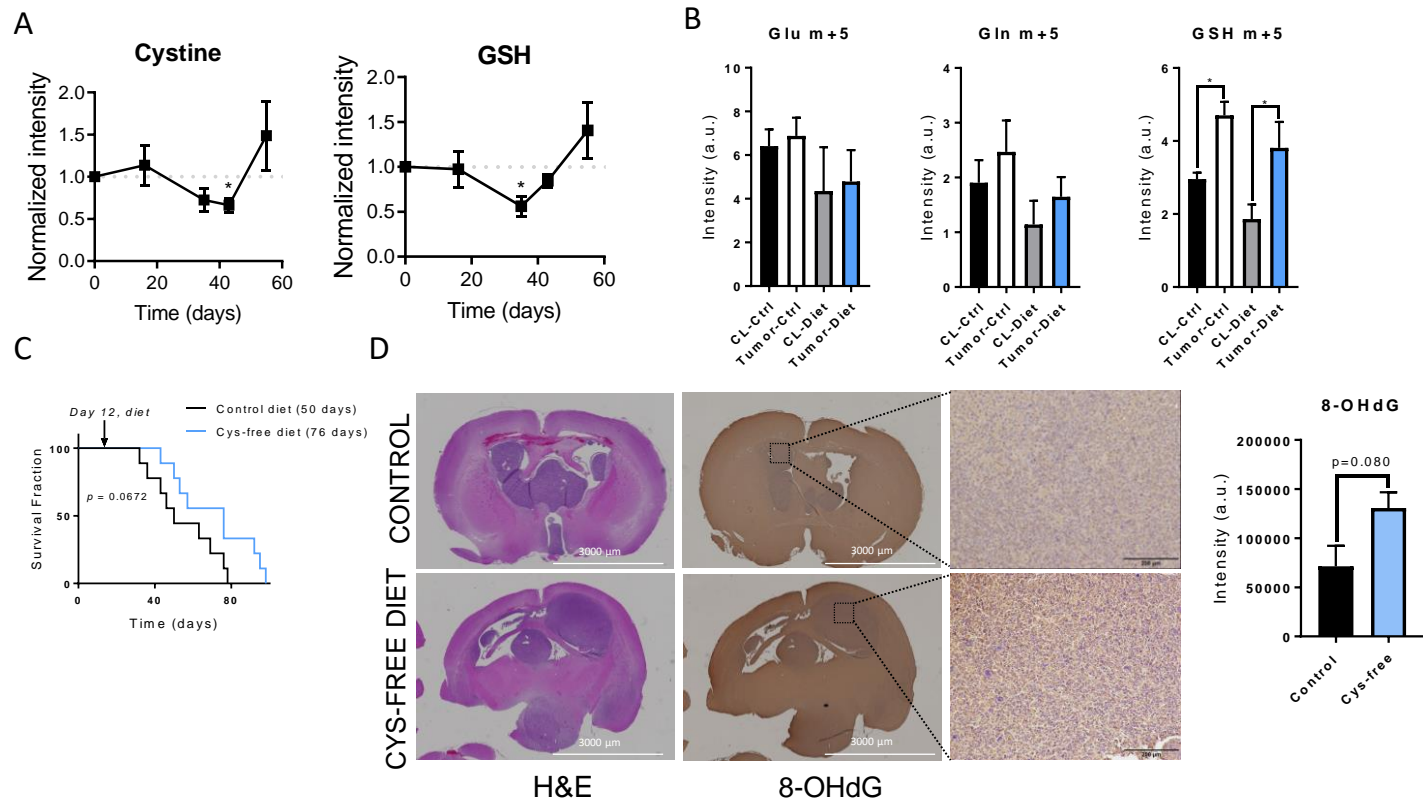

# SUPPLEMENTARY FIGURE 4

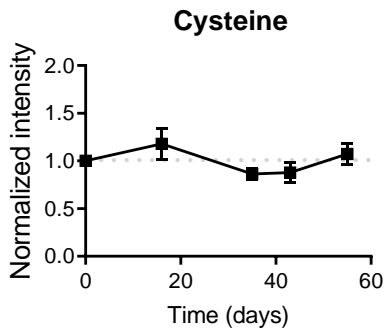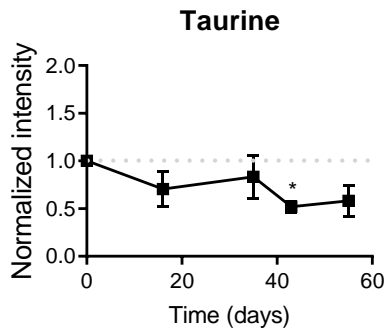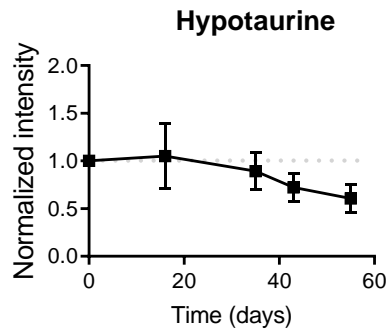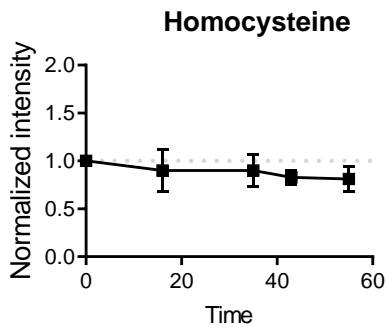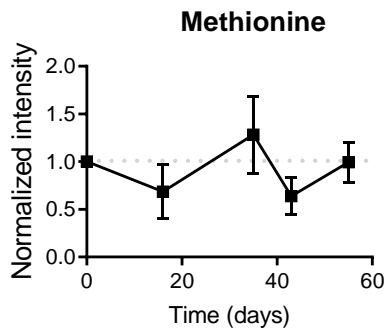

Source: https://biorxiv.org/content/10.1101/2021.01.08.425930v1.full.pdf
